# Supplementary material for: PhI(OAc)2-mediated aminoacyloxylation of β,γ-unsaturated hydrazones using Togni reagent II as an acyloxyl precursor
Source: Royal Society of Chemistry journal article supplement (doi:10.1039/d3ob01125a), 2023-01-01

**PhI(OAc)<sub>2</sub>-Mediated Aminoacyloxylation of  $\beta,\gamma$ -Unsaturated Hydrazones Using Togni  
Reagent II as an Acyloxyl Precursor**

Dong-Fang Jiang,<sup>\*a†</sup> Zhenjie Qi,<sup>b†</sup> Dengfeng Li,<sup>a†</sup> Si-Miaomiao Wen,<sup>a</sup> Zhao liu,<sup>a</sup> Wen-Juan Hao<sup>c</sup>  
and Bo Jiang<sup>\*c</sup>

<sup>a</sup> Hunan Provincial Key Laboratory of the Research and Development of Novel  
Pharmaceutical Preparations, Changsha Medical University, Provincial First-Class Applied  
Discipline (Pharmacy), Changsha, 410219, China, Email: dg1824035@smail.nju.edu.cn

<sup>b</sup> Department of Engineering, Jining University, Qufu, Shandong, 273155 (P. R. China), E-  
mail: 202310001@jnxy.edu.cn

<sup>c</sup> School of Chemistry & Chemical Engineering, Jiangsu Key Laboratory of Green Synthetic  
Chemistry for Functional Materials, Jiangsu Normal University, Xuzhou 221116, P. R.  
China. E-mail: jiangchem@jsnu.edu.cn

**Supporting Information**

|                                                                   |     |
|-------------------------------------------------------------------|-----|
| 1. General remark                                                 | S2  |
| 2. Figure S1 AcOCF <sub>3</sub> were detected by HRMS as followed | S2  |
| 3. General procedure for acyloxyl-substituted pyridazines         | S3  |
| 4. The data of products                                           | S4  |
| 5. X-ray of <b>2a</b> Crystallography details                     | S17 |
| 6. Reference                                                      | S18 |
| 7. Copies of NMR Spectra                                          | S20 |

## 1 General remark

$^1\text{H}$  NMR and  $^{13}\text{C}$  NMR spectra were recorded on 400MHz and 100MHz in  $\text{CDCl}_3$  (BRUKER 400M or JNM-ECS 400M). All chemical shifts were given as  $\delta$  value (ppm) with reference to tetramethylsilane (TMS) as an internal standard. All compounds were further characterized by HRMS; copies of their  $^1\text{H}$  NMR and  $^{13}\text{C}$  NMR spectra are provided. Products were purified by flash chromatography on 200-300 mesh silica gels. All melting points were determined without correction. Unless otherwise noted, commercially available reagents and solvents were used without further purification. The  $\beta$ ,  $\gamma$ -unsaturated hydrazones **1a-1z** were synthesized from the corresponding ketone derivatives according to literature procedures.<sup>1-6</sup>

## 2 Figure S1. $\text{AcOCF}_3$ were detected by HRMS as followed

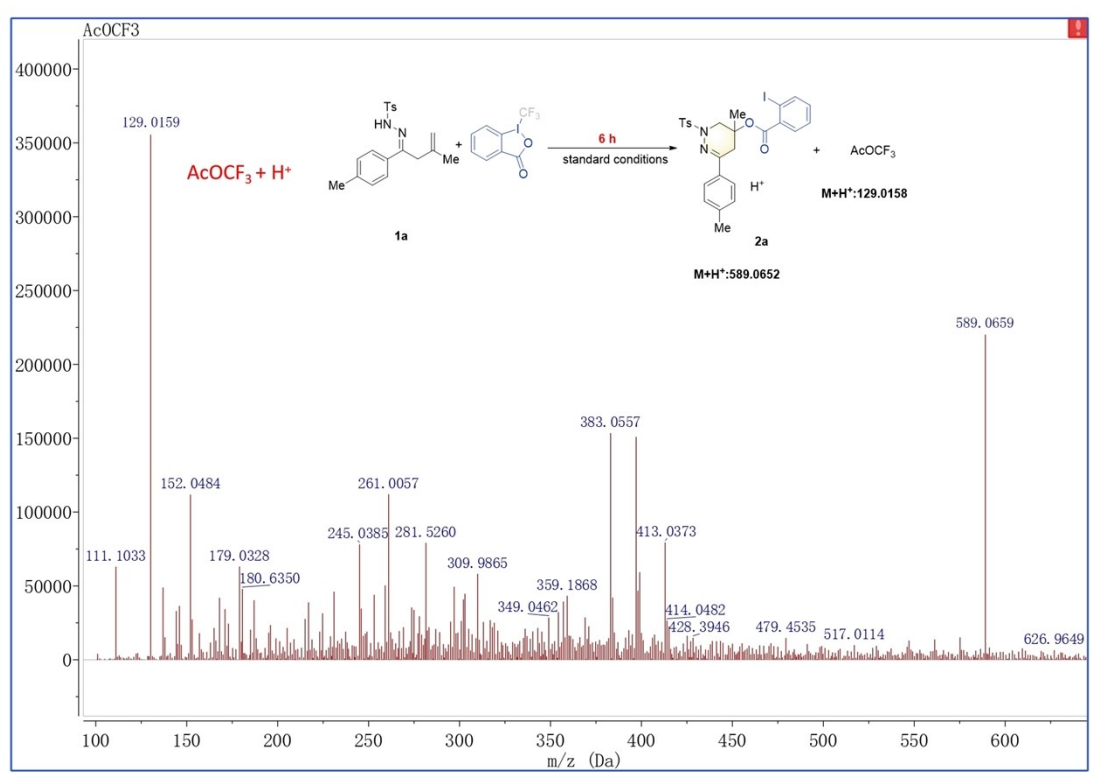

### 3 General procedure for acyloxy-substituted pyridazines

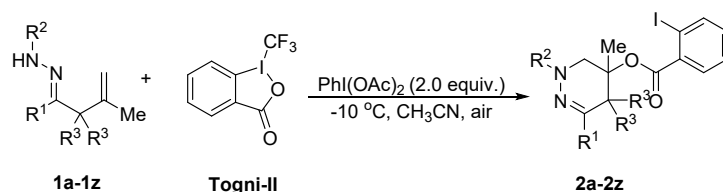

In a sealed tube, 25 mL over-dried Schlenk tube charged with a stir bar,  $\beta,\gamma$ -unsaturated hydrazone **1** (0.2 mmol), Togni-II (0.24 mmol) and iodobenzene diacetate (0.40 mmol) was added MeCN (2.0 mL). The resulting mixture was allowed to stir at -10 °C for 12 hours (monitored by TLC). After completion, solvent was removed under vacuum and the residue was purified by flash silica gel column chromatography using petroleum ether/ethyl acetate (5/1) as eluent to afford pure products **2**.

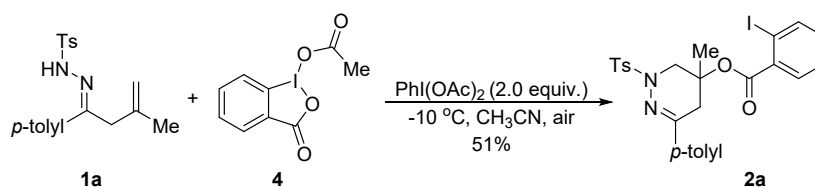

In a sealed tube, 25 mL over-dried Schlenk tube charged with a stir bar,  $\beta,\gamma$ -unsaturated hydrazone **1a** (0.2 mmol), **4** (0.24 mmol) and iodobenzene diacetate (0.40 mmol) was added MeCN (2.0 mL). The resulting mixture was allowed to stir at -10 °C for 12 hours (monitored by TLC). After completion, solvent was removed under vacuum and the residue was purified by flash silica gel column chromatography using petroleum ether/ethyl acetate (5/1) as eluent to afford pure products **2** in 51% yield.

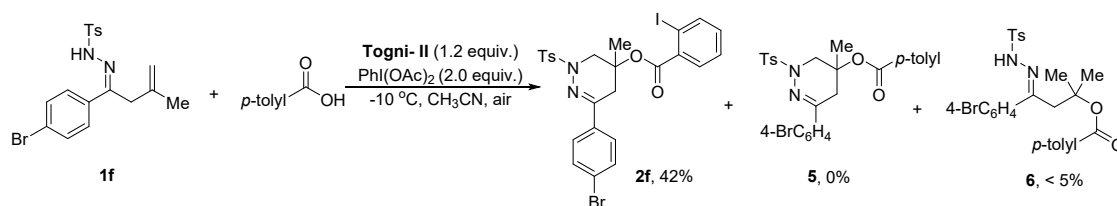

In a sealed tube, 25 mL over-dried Schlenk tube charged with a stir bar,  $\beta,\gamma$ -unsaturated hydrazone **1f** (0.2 mmol), Togni-II (0.24 mmol), *p*-toluic acid (0.24 mmol) and iodobenzene diacetate (0.40 mmol) was added MeCN (2.0 mL). The resulting mixture was allowed to stir at -10 °C for 12 hours (monitored by TLC). After completion, solvent was removed under vacuum and the residue was purified by flash silica gel column chromatography using petroleum ether/ethyl acetate (5/1) as eluent to afford pure products **2f**, **5** and **6** in 42%, 0% and <5% yield,

respectively.

#### 4 The data of products

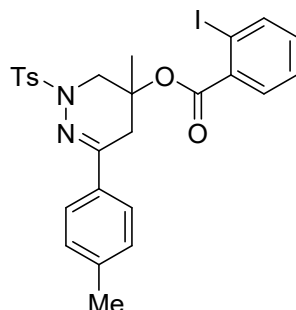

#### 4-Methyl-6-(*p*-tolyl)-2-tosyl-2,3,4,5-tetrahydropyridazin-4-yl 2-iodobenzoate (2a)

Yellow solid (61.3 mg, 74% yield). melting point: 182-184 °C. <sup>1</sup>H NMR (400 MHz, CDCl<sub>3</sub>, ppm): δ 7.83 (dd, *J* = 7.5, 1.9 Hz, 1H), 7.75 (dd, *J* = 20.0, 7.5 Hz, 4H), 7.69 (d, *J* = 1.9 Hz, 1H), 7.43 (td, *J* = 7.5, 2.0 Hz, 1H), 7.35 (d, *J* = 6.8 Hz, 2H), 7.32-7.26 (m, 2H), 7.22 (dd, *J* = 7.5, 2.0 Hz, 1H), 3.63 (d, *J* = 8.4 Hz, 1H), 3.38 (d, *J* = 12.4 Hz, 1H), 2.60 (d, *J* = 12.4 Hz, 1H), 2.42 (s, 3H), 2.35 (d, *J* = 12.0 Hz, 1H), 2.30 (s, 3H), 1.57 (s, 3H); <sup>13</sup>C NMR (100 MHz, CDCl<sub>3</sub>, ppm): δ 166.2, 157.8, 141.7, 141.2, 140.8, 137.9, 135.1, 134.8, 132.3, 130.8, 129.7, 129.3, 128.6, 127.9, 127.3, 97.4, 83.5, 54.4, 36.6, 26.3, 21.6, 21.4; HRMS calcd for C<sub>26</sub>H<sub>26</sub>IN<sub>2</sub>O<sub>4</sub>S [M+H]<sup>+</sup> 589.0652; found: 589.0559.

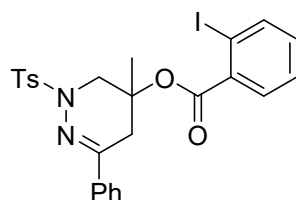

#### 4-Methyl-6-phenyl-2-tosyl-2,3,4,5-tetrahydropyridazin-4-yl 2-iodobenzoate (2b)

Yellow solid (54.1 mg, 71% yield). melting point: 177-179 °C. <sup>1</sup>H NMR (400 MHz, CDCl<sub>3</sub>, ppm): δ 7.98-7.90 (m, 2H), 7.83 (dd, *J* = 7.5, 1.9 Hz, 1H), 7.77 (d, *J* = 7.5 Hz, 2H), 7.70 (dd, *J* = 7.5, 1.9 Hz, 1H), 7.48 (dq, *J* = 9.4, 4.8 Hz, 3H), 7.38-7.30 (m, 3H), 7.21 (td, *J* = 7.5, 2.0 Hz, 1H), 3.63 (d, *J* = 12.0 Hz, 1H), 3.35 (d, *J* = 12.4 Hz, 1H), 2.60 (d, *J* = 12.3 Hz, 1H), 2.42 (s, 3H), 2.17 (d, *J* = 12.0 Hz, 1H), 1.51 (s, 3H); <sup>13</sup>C NMR (100 MHz, CDCl<sub>3</sub>, ppm): δ 166.2, 157.7, 141.7, 139.4, 137.9, 136.1, 135.9, 132.3, 130.8, 129.8, 129.6, 129.3, 128.4, 127.9, 126.9, 96.3, 83.6, 53.7, 35.5, 26.4, 20.3; HRMS calcd for C<sub>25</sub>H<sub>24</sub>IN<sub>2</sub>O<sub>4</sub>S [M+H]<sup>+</sup> 575.0496; found: 575.0492.

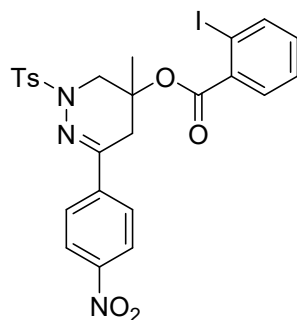

**4-Methyl-6-(4-nitrophenyl)-2-tosyl-2,3,4,5-tetrahydropyridazin-4-yl 2-iodobenzoate (2c)**

Yellow solid (48.8 mg, 67% yield). melting point: 189-191 °C. <sup>1</sup>H NMR (400 MHz, CDCl<sub>3</sub>, ppm): δ 8.35 (ddd, *J* = 6.8, 4.8, 1.8 Hz, 2H), 8.10 (ddd, *J* = 9.5, 8.0, 2.3 Hz, 2H), 7.81 (ddd, *J* = 14.4, 7.8, 4.2 Hz, 3H), 7.70 (dd, *J* = 7.5, 1.9 Hz, 1H), 7.40-7.30 (m, 3H), 7.12 (dd, *J* = 7.5, 1.9 Hz, 1H), 3.74 (s, 1H), 3.46 (s, 1H), 2.65 (s, 1H), 2.35 (d, *J* = 14.4 Hz, 4H), 1.58 (s, 3H); <sup>13</sup>C NMR (100 MHz, CDCl<sub>3</sub>, ppm): δ 165.8, 157.3, 146.0, 141.7, 141.2, 138.7, 137.9, 134.8, 132.3, 130.8, 129.3, 128.6, 127.9, 127.6, 125.0, 97.4, 83.5, 55.2, 35.5, 25.3, 22.0; HRMS calcd for C<sub>25</sub>H<sub>23</sub>IN<sub>3</sub>O<sub>6</sub>S [M+H]<sup>+</sup> 620.0347; found: 620.0341.

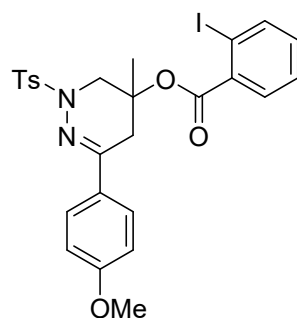

**6-(4-Methoxyphenyl)-4-methyl-2-tosyl-2,3,4,5-tetrahydropyridazin-4-yl 2-iodobenzoate (2d)**

Yellow solid (51.8 mg, 75% yield). melting point: 211-213 °C. <sup>1</sup>H NMR (400 MHz, CDCl<sub>3</sub>, ppm): δ 8.03 (d, *J* = 7.5 Hz, 2H), 7.83 (dd, *J* = 7.5, 1.9 Hz, 1H), 7.73 (ddd, *J* = 9.4, 7.9, 4.2 Hz, 3H), 7.40-7.30 (m, 3H), 7.24-7.16 (m, 1H), 7.07 (d, *J* = 7.5 Hz, 2H), 3.80 (s, 3H), 3.63 (d, *J* = 12.4 Hz, 1H), 3.35 (d, *J* = 12.4 Hz, 1H), 2.60 (d, *J* = 12.4 Hz, 1H), 2.47 (s, 3H), 2.35 (d, *J* = 12.4 Hz, 1H), 1.55 (s, 3H); <sup>13</sup>C NMR (100 MHz, CDCl<sub>3</sub>, ppm): δ 166.7, 160.3, 157.8, 141.7, 141.2, 137.9, 134.8, 132.7, 132.3, 130.8, 129.3, 128.6, 127.9, 127.8, 114.3, 97.6, 83.7, 55.3, 54.4, 36.6, 26.3, 21.6; HRMS calcd for C<sub>26</sub>H<sub>26</sub>IN<sub>2</sub>O<sub>5</sub>S [M+H]<sup>+</sup> 605.0602; found: 605.0606.

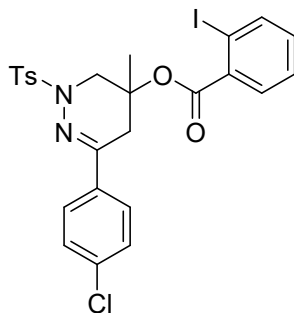

**6-(4-Chlorophenyl)-4-methyl-2-tosyl-2,3,4,5-tetrahydropyridazin-4-yl 2-iodobenzoate (2e)**

Yellow solid (61.7 mg, 70% yield). melting point: 168-170 °C.  $^1\text{H}$  NMR (400 MHz,  $\text{CDCl}_3$ , ppm):  $\delta$  7.83 (dd,  $J = 7.5, 1.9$  Hz, 1H), 7.80-7.75 (m, 3H), 7.70 (dd,  $J = 7.4, 1.9$  Hz, 2H), 7.54 (ddd,  $J = 13.1, 7.5, 1.9$  Hz, 1H), 7.40-7.32 (m, 3H), 7.21 (td,  $J = 7.5, 2.0$  Hz, 1H), 3.72 (d,  $J = 12.4$  Hz, 1H), 3.38 (d,  $J = 12.4$  Hz, 1H), 2.60 (d,  $J = 12.4$  Hz, 1H), 2.40 (s, 3H), 2.35 (d,  $J = 12.4$  Hz, 1H), 1.50 (s, 3H);  $^{13}\text{C}$  NMR (100 MHz,  $\text{CDCl}_3$ , ppm):  $\delta$  165.5, 158.2, 141.7, 141.2, 137.9, 135.9, 135.6, 134.8, 132.3, 130.8, 129.23, 129.2, 128.6, 127.9, 127.5, 97.1, 82.4, 53.9, 36.6, 25.3, 19.9; HRMS calcd for  $\text{C}_{25}\text{H}_{23}\text{ClIN}_2\text{O}_4\text{S}$   $[\text{M}+\text{H}]^+$  609.0106; found: 609.0101.

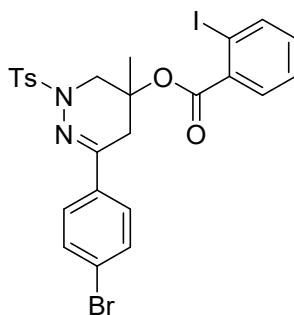

**6-(4-Bromophenyl)-4-methyl-2-tosyl-2,3,4,5-tetrahydropyridazin-4-yl 2-iodobenzoate (2f)**

Yellow solid (81.4 mg, 66% yield). melting point: 189-191 °C.  $^1\text{H}$  NMR (400 MHz,  $\text{CDCl}_3$ , ppm):  $\delta$  7.83 (dd,  $J = 7.5, 1.9$  Hz, 1H), 7.77 (d,  $J = 6.7$  Hz, 1H), 7.70 (td,  $J = 5.6, 2.8$  Hz, 4H), 7.64 (d,  $J = 7.6$  Hz, 2H), 7.35 (dt,  $J = 7.3, 5.1$  Hz, 3H), 7.20 (dd,  $J = 7.5, 2.0$  Hz, 1H), 3.72 (d,  $J = 12.3$  Hz, 1H), 3.49 (d,  $J = 12.4$  Hz, 1H), 2.74 (d,  $J = 12.4$  Hz, 1H), 2.48 (s, 3H), 2.35 (d,  $J = 12.4$  Hz, 1H), 1.54 (s, 3H);  $^{13}\text{C}$  NMR (100 MHz,  $\text{CDCl}_3$ , ppm):  $\delta$  165.5, 157.5, 141.5, 140.6, 137.9, 135.2, 134.78, 132.3, 130.8, 129.3, 128.6, 127.9, 127.8, 126.5, 97.0, 84.3, 53.9, 36.6, 26.1, 21.1; HRMS calcd for  $\text{C}_{25}\text{H}_{23}\text{BrIN}_2\text{O}_4\text{S}$   $[\text{M}+\text{H}]^+$  652.9601; found: 652.9606.

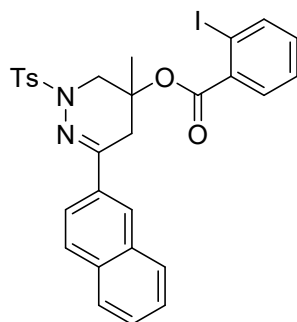

**4-Methyl-6-(naphthalen-2-yl)-2-tosyl-2,3,4,5-tetrahydropyridazin-4-yl 2-iodobenzoate (2g)**

Yellow solid (53.5 mg, 60% yield). melting point: 253-255 °C. <sup>1</sup>H NMR (400 MHz, CDCl<sub>3</sub>, ppm): δ 8.48 (s, 1H), 8.12 (d, *J* = 6.6 Hz, 1H), 7.89-7.80 (m, 3H), 7.77 (d, *J* = 7.5 Hz, 3H), 7.70 (dd, *J* = 7.5, 1.9 Hz, 1H), 7.53-7.45 (m, 2H), 7.40-7.29 (m, 3H), 7.20 (dd, *J* = 7.5, 2.1 Hz, 1H), 3.63 (d, *J* = 12.4 Hz, 1H), 3.34 (d, *J* = 12.4 Hz, 1H), 2.60 (d, *J* = 12.4 Hz, 1H), 2.42 (s, 3H), 2.35 (d, *J* = 12.4 Hz, 1H), 1.57 (s, 3H); <sup>13</sup>C NMR (100 MHz, CDCl<sub>3</sub>, ppm): δ 165.6, 158.6, 141.7, 141.2, 136.9, 134.8, 134.2, 133.8, 132.3, 131.0, 130.8, 129.3, 129.1, 128.9, 128.6, 127.9, 127.8, 127.0, 126.1, 124.7, 96.3, 83.2, 55.2, 35.5, 27.1, 21.3; HRMS calcd for C<sub>29</sub>H<sub>26</sub>IN<sub>2</sub>O<sub>4</sub>S [M+H]<sup>+</sup> 625.0652; found: 625.0657.

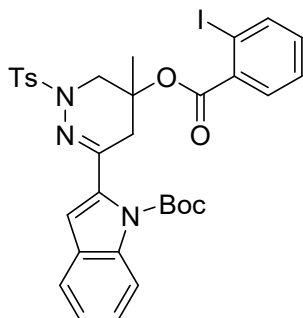

***tert*-Butyl 2-(5-methyl-1-tosyl-1,4,5,6-tetrahydropyridazin-3-yl)-1H-indole-1-carboxylate (2h)**

Yellow solid (27.8 mg, 57% yield). melting point: 157-159 °C. <sup>1</sup>H NMR (400 MHz, CDCl<sub>3</sub>, ppm): δ 8.22 (d, *J* = 7.5 Hz, 1H), 8.00 (d, *J* = 7.5 Hz, 1H), 7.83 (dd, *J* = 7.5, 1.9 Hz, 1H), 7.77 (d, *J* = 7.5 Hz, 2H), 7.70 (dd, *J* = 7.5, 1.9 Hz, 1H), 7.44 (td, *J* = 7.5, 1.4 Hz, 1H), 7.35 (dt, *J* = 7.3, 5.1 Hz, 3H), 7.21 (td, *J* = 7.5, 2.0 Hz, 1H), 6.98-6.86 (m, 1H), 6.23 (s, 1H), 3.63 (d, *J* = 12.4 Hz, 1H), 3.38 (d, *J* = 12.4 Hz, 1H), 2.60 (d, *J* = 12.4 Hz, 1H), 2.42 (s, 3H), 2.35 (d, *J* = 12.4 Hz, 1H), 1.61 (s, 9H), 1.57 (s, 3H); <sup>13</sup>C NMR (100 MHz, CDCl<sub>3</sub>, ppm): δ 166.2, 159.9, 151.9, 141.7, 141.2, 140.6, 137.9, 137.9, 136.4, 134.8, 132.3, 130.8, 130.1, 129.3, 128.6, 127.9, 124.2, 123.2, 121.0, 115.3, 110.8, 97.6, 83.3, 83.1, 54.4, 35.1, 27.9, 26.3, 21.6; HRMS calcd for C<sub>32</sub>H<sub>33</sub>IN<sub>3</sub>O<sub>6</sub>S [M+H]<sup>+</sup> 714.1129; found: 714.1120.

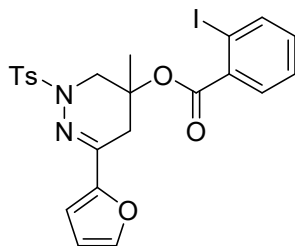

**6-(Furan-2-yl)-4-methyl-2-tosyl-2,3,4,5-tetrahydropyridazin-4-yl 2-iodobenzoate (2i)**

Yellow solid (53.6 mg, 72% yield). melting point: 128-130 °C. <sup>1</sup>H NMR (400 MHz, CDCl<sub>3</sub>, ppm): δ 7.83 (dd, *J* = 7.5, 1.9 Hz, 1H), 7.77 (d, *J* = 7.5 Hz, 2H), 7.70 (dd, *J* = 7.5, 1.9 Hz, 1H), 7.40-7.33 (m, 3H), 7.20 (dd, *J* = 7.5, 2.0 Hz, 2H), 6.45 (dd, *J* = 7.5, 1.3 Hz, 1H), 6.21 (t, *J* = 7.5 Hz, 1H), 3.59 (d, *J* = 12.4 Hz, 1H), 3.42 (d, *J* = 12.4 Hz, 1H), 2.60 (d, *J* = 12.4 Hz, 1H), 2.40-2.30 (m, 4H), 1.55 (s, 3H); <sup>13</sup>C NMR (100 MHz, CDCl<sub>3</sub>, ppm): δ 167.0, 156.8, 147., 145.1, 141.7, 141.2, 137.9, 134.8, 132.3, 130.8, 129.3, 128.4, 127.9, 115.8, 112.5, 97.4, 84.3, 53.3, 35.5, 26.6, 20.7; HRMS calcd for C<sub>23</sub>H<sub>22</sub>IN<sub>2</sub>O<sub>5</sub>S [M+H]<sup>+</sup> 565.0289; found: 565.0284.

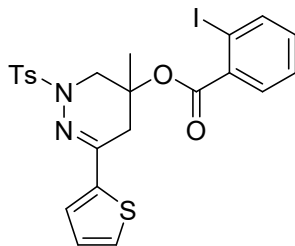

**4-Methyl-6-(thiophen-2-yl)-2-tosyl-2,3,4,5-tetrahydropyridazin-4-yl 2-iodobenzoate (2j)**

Yellow solid (54.9 mg, 76% yield). melting point: 144-146 °C. <sup>1</sup>H NMR (400 MHz, CDCl<sub>3</sub>, ppm): δ 7.91 (dd, *J* = 7.4, 2.0 Hz, 1H), 7.77 (d, *J* = 7.5 Hz, 2H), 7.70 (dd, *J* = 7.4, 1.9 Hz, 1H), 7.57 (dd, *J* = 6.1, 2.9 Hz, 1H), 7.38-7.28 (m, 3H), 7.24-7.17 (m, 1H), 7.13-7.06 (m, 2H), 3.78 (d, *J* = 12.4 Hz, 1H), 3.33 (d, *J* = 12.4 Hz, 1H), 2.65 (d, *J* = 12.4 Hz, 1H), 2.40-2.30 (m, 4H), 1.57 (s, 3H); <sup>13</sup>C NMR (100 MHz, CDCl<sub>3</sub>, ppm): δ 165.8, 152.3, 144.0, 141.7, 141.2, 137.9, 134.8, 132.3, 130.8, 130.3, 129.3, 127.9, 127.3, 126.0, 125.6, 98.3, 83.3, 54.6, 37.3, 25.2, 20.9; HRMS calcd for C<sub>23</sub>H<sub>22</sub>IN<sub>2</sub>O<sub>4</sub>S<sub>2</sub> [M+H]<sup>+</sup> 581.0060; found: 581.0053.

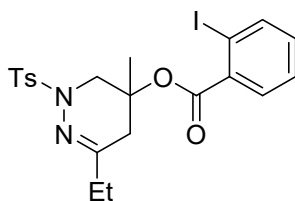

**6-Ethyl-4-methyl-2-tosyl-2,3,4,5-tetrahydropyridazin-4-yl 2-iodobenzoate (2k)**

Yellow solid (53.8 mg, 69% yield). melting point: 131-133 °C. <sup>1</sup>H NMR (400 MHz, CDCl<sub>3</sub>, ppm):



$\delta$  7.83 (dd,  $J = 7.4, 2.0$  Hz, 1H), 7.77 (dd,  $J = 7.5, 1.9$  Hz, 1H), 7.68 (ddd,  $J = 12.9, 7.5, 1.9$  Hz, 2H), 7.35 (ddd,  $J = 7.4, 4.7, 2.2$  Hz, 2H), 7.31-7.27 (m, 1H), 7.24 (d,  $J = 1.9$  Hz, 1H), 3.77 (d,  $J = 12.4$  Hz, 1H), 3.38 (d,  $J = 12.4$  Hz, 1H), 2.60 (d,  $J = 12.4$  Hz, 1H), 2.42 (s, 3H), 2.35-2.29 (m, 2H), 2.15 (d,  $J = 8.0$  Hz, 1H), 1.56 (s, 3H), 0.84 (t,  $J = 8.0$  Hz, 3H);  $^{13}\text{C}$  NMR (100 MHz,  $\text{CDCl}_3$ , ppm):  $\delta$  166.8, 159.0, 141.7, 141.2, 137.9, 134.8, 132.3, 130.8, 129.3, 128.4, 125.0, 98.8, 81.7, 54.5, 40.8, 30.5, 25.9, 22.5, 8.8; HRMS calcd for  $\text{C}_{21}\text{H}_{24}\text{IN}_2\text{O}_4\text{S}$   $[\text{M}+\text{H}]^+$  527.0496; found: 527.0491.

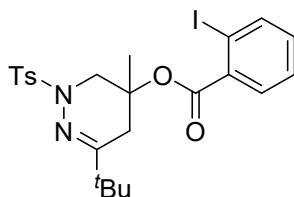

**6-(*tert*-Butyl)-4-methyl-2-tosyl-2,3,4,5-tetrahydropyridazin-4-yl 2-iodobenzoate (2l)**

Yellow solid (6.1 mg, 63% yield). melting point: 147-149 °C.  $^1\text{H}$  NMR (400 MHz,  $\text{CDCl}_3$ , ppm):  $\delta$  7.83 (dd,  $J = 7.5, 1.9$  Hz, 1H), 7.77 (d,  $J = 7.5$  Hz, 2H), 7.70 (dd,  $J = 7.5, 1.9$  Hz, 1H), 7.35 (dt,  $J = 7.3, 5.1$  Hz, 3H), 7.21 (td,  $J = 7.5, 2.0$  Hz, 1H), 3.63 (d,  $J = 12.4$  Hz, 1H), 3.38 (d,  $J = 12.4$  Hz, 1H), 2.60 (d,  $J = 12.4$  Hz, 1H), 2.42 (s, 3H), 2.35 (d,  $J = 12.4$  Hz, 1H), 1.57 (s, 3H), 1.25 (s, 9H);  $^{13}\text{C}$  NMR (100 MHz,  $\text{CDCl}_3$ , ppm):  $\delta$  166.2, 164.1, 141.7, 141.2, 137.9, 134.8, 132.3, 130.8, 129.3, 128.6, 126.2, 97.4, 82.9, 54.4, 38.0, 37.8, 27.7, 26.3, 21.6; HRMS calcd for  $\text{C}_{23}\text{H}_{28}\text{IN}_2\text{O}_4\text{S}$   $[\text{M}+\text{H}]^+$  555.0809; found: 555.0814.

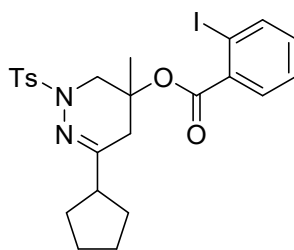

**6-Cyclopentyl-4-methyl-2-tosyl-2,3,4,5-tetrahydropyridazin-4-yl 2-iodobenzoate (2m)**

Yellow solid (42.8 mg, 70% yield). melting point: 162-164 °C.  $^1\text{H}$  NMR (400 MHz,  $\text{CDCl}_3$ , ppm):  $\delta$  7.94 (dd,  $J = 7.5, 1.9$  Hz, 1H), 7.77 (d,  $J = 7.4$  Hz, 2H), 7.66 (dd,  $J = 7.5, 2.0$  Hz, 1H), 7.35 (td,  $J = 7.4, 2.0$  Hz, 3H), 7.21 (td,  $J = 7.5, 2.0$  Hz, 1H), 3.63 (d,  $J = 12.4$  Hz, 1H), 3.38 (d,  $J = 12.4$  Hz, 1H), 2.60 (d,  $J = 12.4$  Hz, 1H), 2.51 (s, 3H), 2.35 (d,  $J = 12.4$  Hz, 1H), 2.00 (dd,  $J = 12.5, 6.5$  Hz, 1H), 1.85-1.39 (m, 11H);  $^{13}\text{C}$  NMR (100 MHz,  $\text{CDCl}_3$ , ppm):  $\delta$  173.6, 166.5, 141.7, 141.3, 137.9, 134.8, 132.3, 130.8, 129.3, 127.9, 125.8, 97.4, 82.2, 54.4, 40.2, 37.2, 31.9, 26.3, 25.9, 21.6; HRMS calcd for  $\text{C}_{24}\text{H}_{28}\text{IN}_2\text{O}_4\text{S}$   $[\text{M}+\text{H}]^+$  567.0809; found: 567.0817.

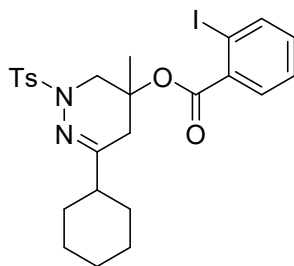

**6-Cyclohexyl-4-methyl-2-tosyl-2,3,4,5-tetrahydropyridazin-4-yl 2-iodobenzoate (2n)**

Yellow solid (55.1 mg, 72% yield). melting point: 156-158 °C. <sup>1</sup>H NMR (400 MHz, CDCl<sub>3</sub>, ppm): δ 7.83 (d, *J* = 7.4 Hz, 1H), 7.77 (d, *J* = 7.5 Hz, 1H), 7.75-7.66 (m, 2H), 7.35 (dt, *J* = 7.5, 3.7 Hz, 2H), 7.25 (s, 1H), 7.21 (t, *J* = 7.5 Hz, 1H), 3.63 (d, *J* = 12.4 Hz, 1H), 3.38 (d, *J* = 12.4 Hz, 1H), 2.60 (d, *J* = 12.4 Hz, 1H), 2.42 (s, 3H), 2.35 (d, *J* = 12.4 Hz, 1H), 1.91-1.72 (m, 5H), 1.70-1.61 (m, 1H), 1.57 (s, 3H), 1.55-1.49 (m, 2H), 1.49-1.41 (m, 2H), 1.39-1.28 (m, 1H); <sup>13</sup>C NMR (100 MHz, CDCl<sub>3</sub>, ppm): δ 169.9, 165.8, 141.7, 141.2, 137.9, 134.8, 132.3, 130.8, 129.3, 128.4, 127.9, 97.1, 81.7, 54.4, 42.9, 37.2, 29.3, 27.3, 26.3, 24.7, 20.5; HRMS calcd for C<sub>25</sub>H<sub>30</sub>IN<sub>2</sub>O<sub>4</sub>S [M+H]<sup>+</sup> 581.0965; found: 581.0971.

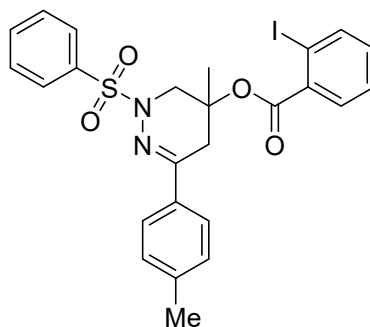

**4-Methyl-2-(phenylsulfonyl)-6-(*p*-tolyl)-2,3,4,5-tetrahydropyridazin-4-yl 2-iodobenzoate (2o)**

Yellow solid (55.0 mg, 72% yield). melting point: 196-198 °C. <sup>1</sup>H NMR (400 MHz, CDCl<sub>3</sub>, ppm): δ 7.83 (ddd, *J* = 7.5, 3.9, 2.0 Hz, 3H), 7.71 (dd, *J* = 11.7, 4.7 Hz, 3H), 7.65-7.58 (m, 1H), 7.54 (t, *J* = 7.3 Hz, 2H), 7.35 (td, *J* = 7.5, 2.0 Hz, 1H), 7.29 (s, 1H), 7.25-7.18 (m, 2H), 3.63 (d, *J* = 12.4 Hz, 1H), 3.38 (d, *J* = 12.4 Hz, 1H), 2.60 (d, *J* = 12.4 Hz, 1H), 2.35 (d, *J* = 12.4 Hz, 1H), 2.13 (s, 3H), 1.64 (s, 3H); <sup>13</sup>C NMR (100 MHz, CDCl<sub>3</sub>, ppm): δ 166.3, 157.3, 141.2, 140.4, 138.0, 136.7, 134.8, 133.8, 132.3, 130.8, 129.4, 129.3, 128.6, 127.9, 127.3, 98.0, 83.4, 54.6, 36.7, 26.1, 20.5; HRMS calcd for C<sub>25</sub>H<sub>24</sub>IN<sub>2</sub>O<sub>4</sub>S [M+H]<sup>+</sup> 575.0496; found: 575.0491.

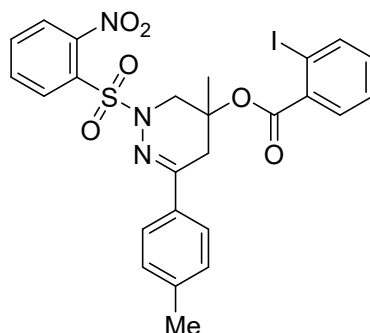

**4-Methyl-2-((2-nitrophenyl)sulfonyl)-6-(*p*-tolyl)-2,3,4,5-tetrahydropyridazin-4-yl 2-iodobenzoate (2p)**

Yellow solid (56.4 mg, 64% yield). melting point: 223-225 °C. <sup>1</sup>H NMR (400 MHz, CDCl<sub>3</sub>, ppm): δ 8.37 (ddd, *J* = 19.7, 7.5, 2.0 Hz, 2H), 8.14 (td, *J* = 7.5, 2.0 Hz, 1H), 7.92-7.76 (m, 3H), 7.76-7.65 (m, 2H), 7.35 (td, *J* = 7.5, 2.0 Hz, 1H), 7.30-7.27 (m, 2H), 7.21 (td, *J* = 7.5, 2.0 Hz, 1H), 3.63 (d, *J* = 12.4 Hz, 1H), 3.42 (d, *J* = 12.4 Hz, 1H), 2.60 (d, *J* = 12.4 Hz, 1H), 2.35 (d, *J* = 10.9 Hz, 4H), 1.54 (s, 3H); <sup>13</sup>C NMR (100 MHz, CDCl<sub>3</sub>, ppm): δ 165.6, 158.0, 149.4, 141.2, 140.8, 135.1, 134.8, 133.8, 133.3, 133.0, 132.3, 130.8, 129.4, 129.4, 127.9, 127.3, 125.7, 97.8, 84.5, 53.8, 37.3, 26.2, 21.8; HRMS calcd for C<sub>25</sub>H<sub>23</sub>IN<sub>3</sub>O<sub>6</sub>S [M+H]<sup>+</sup> 620.0347; found: 620.0352.

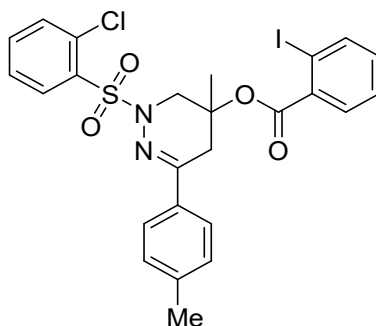

**2-((2-Chlorophenyl)sulfonyl)-4-methyl-6-(*p*-tolyl)-2,3,4,5-tetrahydropyridazin-4-yl 2-iodobenzoate (2q)**

Yellow solid (64.4 mg, 71% yield). melting point: 217-219 °C. <sup>1</sup>H NMR (400 MHz, CDCl<sub>3</sub>, ppm): δ 7.92-7.79 (m, 2H), 7.71 (dd, *J* = 11.7, 4.7 Hz, 3H), 7.62 (d, *J* = 4.1 Hz, 2H), 7.35 (td, *J* = 7.5, 2.0 Hz, 1H), 7.28 (d, *J* = 7.8 Hz, 2H), 7.23-7.16 (m, 2H), 3.72 (d, *J* = 12.4 Hz, 1H), 3.38 (d, *J* = 12.4 Hz, 1H), 2.72 (d, *J* = 12.4 Hz, 1H), 2.36 (s, 1H), 2.33 (s, 3H), 1.56 (s, 3H); <sup>13</sup>C NMR (100 MHz, CDCl<sub>3</sub>, ppm): δ 166.3, 157.7, 141.6, 141.2, 139.0, 135.1, 134.8, 133.8, 132.3, 131.3, 131.2, 130.8, 130.0, 129.4, 129.0, 127.9, 127.3, 97.1, 84.3, 54.8, 35.8, 25.5, 20.1; HRMS calcd for C<sub>25</sub>H<sub>23</sub>ClIN<sub>2</sub>O<sub>4</sub>S [M+H]<sup>+</sup> 609.0106; found: 609.0112.

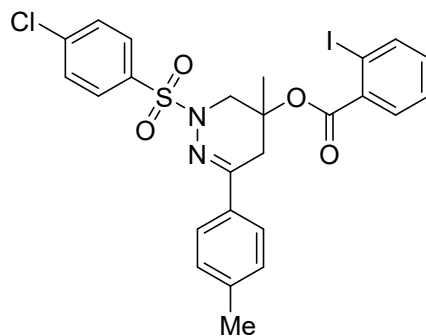

**2-((4-Chlorophenyl)sulfonyl)-4-methyl-6-(*p*-tolyl)-2,3,4,5-tetrahydropyridazin-4-yl 2-iodobenzoate (2r)**

Yellow solid (55.1 mg, 73% yield). melting point: 201-203 °C. <sup>1</sup>H NMR (400 MHz, CDCl<sub>3</sub>, ppm): δ 7.91-7.78 (m, 3H), 7.77-7.66 (m, 2H), 7.61 (dd, *J* = 7.0, 3.1 Hz, 3H), 7.35 (td, *J* = 7.5, 2.0 Hz, 1H), 7.30-7.27 (m, 2H), 7.21 (td, *J* = 7.5, 2.0 Hz, 1H), 3.63 (d, *J* = 12.4 Hz, 1H), 3.48 (d, *J* = 12.4 Hz, 1H), 2.61 (d, *J* = 12.4 Hz, 1H), 2.35 (d, *J* = 12.4 Hz, 1H), 2.30 (s, 3H), 1.55 (s, 3H); <sup>13</sup>C NMR (100 MHz, CDCl<sub>3</sub>, ppm): δ 165.3, 157.9, 141.2, 140.8, 140.6, 138.0, 135.5, 134.8, 132.3, 130.8, 130.7, 129.8, 129.4, 127.9, 127.3, 98.1, 83.8, 53.8, 35.5, 26.2, 20.9; HRMS calcd for C<sub>25</sub>H<sub>23</sub>ClIN<sub>2</sub>O<sub>4</sub>S [M+H]<sup>+</sup> 609.0106; found: 609.0100.

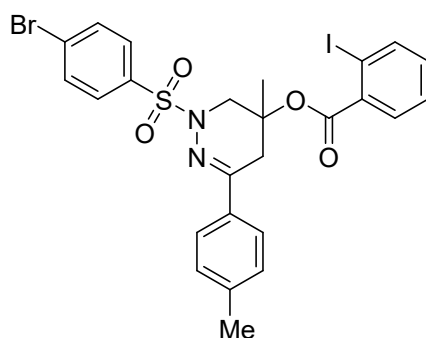

**2-((4-Bromophenyl)sulfonyl)-4-methyl-6-(*p*-tolyl)-2,3,4,5-tetrahydropyridazin-4-yl 2-iodobenzoate (2s)**

Yellow solid (51.3 mg, 71% yield). melting point: 231-233 °C. <sup>1</sup>H NMR (400 MHz, CDCl<sub>3</sub>, ppm): δ 7.95-7.82 (m, 5H), 7.74-7.65 (m, 3H), 7.35 (td, *J* = 7.5, 2.0 Hz, 1H), 7.31-7.27 (m, 2H), 7.21 (td, *J* = 7.5, 2.0 Hz, 1H), 3.72 (d, *J* = 12.4 Hz, 1H), 3.38 (d, *J* = 12.4 Hz, 1H), 2.53 (d, *J* = 12.3 Hz, 1H), 2.35 (d, *J* = 12.3 Hz, 1H), 2.30 (s, 3H), 1.56 (s, 3H); <sup>13</sup>C NMR (100 MHz, CDCl<sub>3</sub>, ppm): δ 167.0, 157.9, 141.5, 141.2, 138.2, 135.1, 134.8, 132.7, 132.3, 130.8, 130.1, 129.4, 129.2, 127.9, 127.3, 96.3, 83.9, 53.5, 36.7, 27.4, 22.3; HRMS calcd for C<sub>25</sub>H<sub>23</sub>BrIN<sub>2</sub>O<sub>4</sub>S [M+H]<sup>+</sup> 652.9601; found: 652.9609.

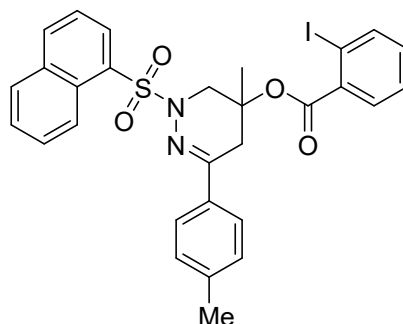

**4-Methyl-2-(naphthalen-1-ylsulfonyl)-6-(*p*-tolyl)-2,3,4,5-tetrahydropyridazin-4-yl 2-iodobenzoate (2t)**

Yellow solid (55.1 mg, 66% yield). melting point: 304-306 °C. <sup>1</sup>H NMR (400 MHz, CDCl<sub>3</sub>, ppm): δ 8.72 (d, *J* = 7.3 Hz, 1H), 8.23 (d, *J* = 7.5 Hz, 2H), 7.93-7.79 (m, 2H), 7.71 (dd, *J* = 11.7, 4.7 Hz, 3H), 7.53-7.43 (m, 2H), 7.40 (td, *J* = 7.4, 1.5 Hz, 1H), 7.28 (dd, *J* = 10.1, 4.6 Hz, 3H), 7.24-7.14 (m, 1H), 3.77 (d, *J* = 12.4 Hz, 1H), 3.38 (d, *J* = 12.4 Hz, 1H), 2.60 (d, *J* = 12.4 Hz, 1H), 2.35 (d, *J* = 12.4 Hz, 1H), 2.23 (s, 3H), 1.58 (s, 3H); <sup>13</sup>C NMR (100 MHz, CDCl<sub>3</sub>, ppm): δ 166.2, 157.8, 141.2, 140.8, 136.3, 135.4, 135.1, 134.8, 132.3, 130.8, 130.3, 130.3, 130.0, 129.4, 129.1, 127.9, 127.3, 127.0, 125.7, 122.9, 97.4, 83.5, 54.4, 36.6, 26.3, 21.4; HRMS calcd for C<sub>29</sub>H<sub>26</sub>IN<sub>2</sub>O<sub>4</sub>S [M+H]<sup>+</sup> 625.0652; found: 625.0659.

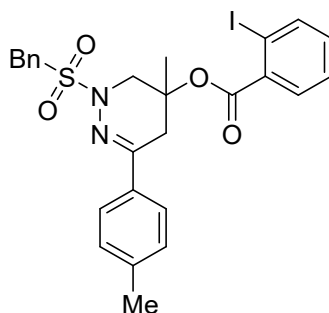

**2-(Benzylsulfonyl)-4-methyl-6-(*p*-tolyl)-2,3,4,5-tetrahydropyridazin-4-yl 2-iodobenzoate (2u)**

Yellow solid (36.6 mg, 66% yield). melting point: 178-180 °C. <sup>1</sup>H NMR (400 MHz, CDCl<sub>3</sub>, ppm): δ 7.83 (dd, *J* = 7.5, 1.9 Hz, 1H), 7.71 (dd, *J* = 11.7, 4.7 Hz, 3H), 7.47-7.31 (m, 5H), 7.31-7.26 (m, 2H), 7.25-7.16 (m, 2H), 4.68 (d, *J* = 3.4 Hz, 2H), 3.16 (d, *J* = 12.4 Hz, 1H), 2.87 (d, *J* = 12.3 Hz, 1H), 2.60 (d, *J* = 12.4 Hz, 1H), 2.39 (d, *J* = 12.4 Hz, 1H), 2.30 (s, 3H), 1.54 (s, 3H); <sup>13</sup>C NMR (100 MHz, CDCl<sub>3</sub>, ppm): δ 166.2, 163.2, 141.2, 140.0, 134.8, 133.9, 132.5, 132.3, 130.8, 130.8, 129.5, 129.3, 128.2, 127.9, 125.6, 98.7, 83.2, 57.0, 55.7, 35.8, 25.9, 20.5; HRMS calcd for C<sub>26</sub>H<sub>26</sub>IN<sub>2</sub>O<sub>4</sub>S [M+H]<sup>+</sup> 589.0652; found: 589.0658.

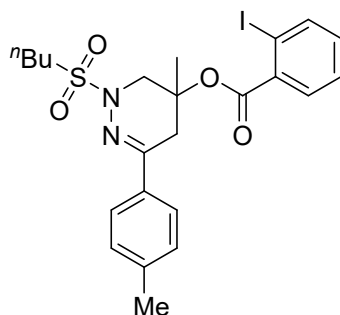

**2-(Butylsulfonyl)-4-methyl-6-(*p*-tolyl)-2,3,4,5-tetrahydropyridazin-4-yl 2-iodobenzoate (2v)**

Yellow solid (70.2 mg, 53% yield). melting point: 181-183 °C. <sup>1</sup>H NMR (400 MHz, CDCl<sub>3</sub>, ppm): δ 7.83 (dd, *J* = 7.5, 1.9 Hz, 1H), 7.72 (d, *J* = 7.5 Hz, 2H), 7.71-7.67 (m, 1H), 7.35 (td, *J* = 7.5, 2.0 Hz, 1H), 7.31-7.27 (m, 2H), 7.21 (td, *J* = 7.5, 2.0 Hz, 1H), 3.38 (ddd, *J* = 24.0, 12.0, 7.8 Hz, 3H), 2.87 (d, *J* = 12.4 Hz, 1H), 2.57 (d, *J* = 12.3 Hz, 1H), 2.35 (d, *J* = 12.4 Hz, 1H), 2.30 (s, 3H), 1.87-1.77 (m, 1H), 1.71-1.58 (m, 1H), 1.58 (d, *J* = 8.0 Hz, 3H), 1.50 (dt, *J* = 15.4, 7.7 Hz, 2H), 0.91 (t, *J* = 7.9 Hz, 3H); <sup>13</sup>C NMR (100 MHz, CDCl<sub>3</sub>, ppm): δ 166.5, 164.5, 141.2, 140.8, 135.1, 134.8, 132.3, 130.8, 129.4, 127.9, 127.3, 96.5, 82.7, 57.4, 52.1, 36.9, 26.3, 25.1, 21.1, 20.8, 13.2; HRMS calcd for C<sub>23</sub>H<sub>28</sub>IN<sub>2</sub>O<sub>4</sub>S [M+H]<sup>+</sup> 555.0809; found: 555.0814.

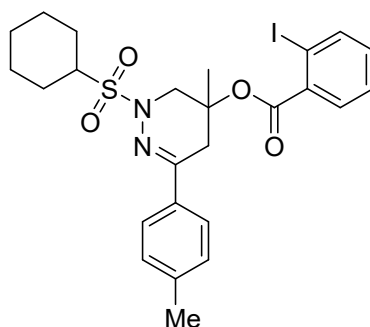

**2-(Cyclohexylsulfonyl)-4-methyl-6-(*p*-tolyl)-2,3,4,5-tetrahydropyridazin-4-yl 2-iodobenzoate (2w)**

Yellow solid (53.8 mg, 59% yield). melting point: 179-181 °C. <sup>1</sup>H NMR (400 MHz, CDCl<sub>3</sub>, ppm): δ 7.83 (d, *J* = 7.4 Hz, 1H), 7.71 (t, *J* = 7.7 Hz, 3H), 7.29 (t, *J* = 6.9 Hz, 3H), 7.21 (t, *J* = 7.4 Hz, 1H), 3.12 (d, *J* = 12.4 Hz, 1H), 2.90-2.75 (m, 2H), 2.60 (d, *J* = 12.4 Hz, 1H), 2.35 (d, *J* = 12.4 Hz, 1H), 2.32 (d, *J* = 13.4 Hz, 3H), 2.09 (dt, *J* = 13.2, 6.7 Hz, 2H), 1.83 (dd, *J* = 13.0, 6.7 Hz, 2H), 1.75-1.61 (m, 2H), 1.57 (s, 3H), 1.51-1.27 (m, 4H); <sup>13</sup>C NMR (100 MHz, CDCl<sub>3</sub>, ppm): δ 167.3, 162.6, 141.2, 140.8, 135.1, 134.8, 132.3, 130.8, 129.4, 127.9, 127.3, 97.4, 83.5, 57.1, 55.9, 36.6, 26.3, 26.0, 24.4, 24.3, 21.4; HRMS calcd for C<sub>25</sub>H<sub>30</sub>IN<sub>2</sub>O<sub>4</sub>S [M+H]<sup>+</sup> 581.0965; found: 581.0970.

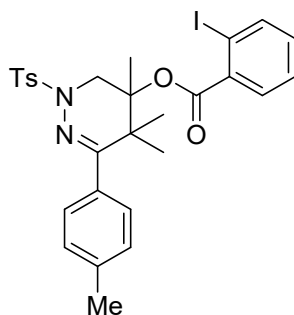

**4,5,5-Trimethyl-6-(*p*-tolyl)-2-tosyl-2,3,4,5-tetrahydropyridazin-4-yl 2-iodobenzoate (2x)**

Yellow solid (43.2 mg, 75% yield). melting point: 168-170 °C. <sup>1</sup>H NMR (400 MHz, CDCl<sub>3</sub>, ppm): δ 7.89-7.79 (m, 2H), 7.77 (dd, *J* = 7.4, 1.9 Hz, 1H), 7.71 (dd, *J* = 11.7, 4.7 Hz, 3H), 7.46-7.32 (m, 2H), 7.30 (d, *J* = 7.1 Hz, 3H), 7.21 (d, *J* = 2.0 Hz, 1H), 3.63 (d, *J* = 12.4 Hz, 1H), 3.38 (d, *J* = 12.4 Hz, 1H), 2.38 (s, 3H), 2.30 (s, 3H), 1.52 (s, 3H), 1.13 (s, 3H), 0.86 (s, 3H); <sup>13</sup>C NMR (100 MHz, CDCl<sub>3</sub>, ppm): δ 166.6, 163.2, 141.7, 141.5, 141.2, 137.9, 134.8, 132.3, 131.9, 130.8, 129.3, 128.4, 127.9, 127.4, 97.4, 80.2, 49.6, 48.3, 23.0, 22.1, 21.4, 20.1; HRMS calcd for C<sub>28</sub>H<sub>30</sub>IN<sub>2</sub>O<sub>4</sub>S [M+H]<sup>+</sup> 617.0965; found: 617.0960.

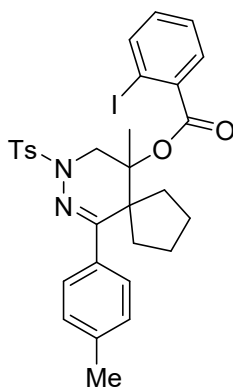

**10-Methyl-6-(*p*-tolyl)-8-tosyl-7,8-diazaspiro[4.5]dec-6-en-10-yl 2-iodobenzoate (2y)**

Yellow solid (43.8 mg, 73% yield). melting point: 160-162 °C. <sup>1</sup>H NMR (400 MHz, CDCl<sub>3</sub>, ppm): δ 7.83 (dd, *J* = 7.5, 1.9 Hz, 1H), 7.78-7.60 (m, 5H), 7.34 (td, *J* = 7.5, 4.6 Hz, 3H), 7.31-7.26 (m, 2H), 7.21 (d, *J* = 2.0 Hz, 1H), 3.63 (d, *J* = 12.4 Hz, 1H), 3.38 (d, *J* = 12.4 Hz, 1H), 2.42 (s, 3H), 2.30 (s, 3H), 1.62 (dd, *J* = 6.4, 3.8 Hz, 7H), 1.53 (d, *J* = 4.8 Hz, 6H); <sup>13</sup>C NMR (100 MHz, CDCl<sub>3</sub>, ppm): δ 167.7, 163.2, 141.7, 141.5, 141.2, 137.9, 134.8, 132.3, 132.0, 130.8, 129.6, 129.3, 128.6, 127.9, 127.6, 96.5, 53.9, 50.0, 36.1, 24.6, 22.1, 21.6, 20.1; HRMS calcd for C<sub>30</sub>H<sub>32</sub>IN<sub>2</sub>O<sub>4</sub>S [M+H]<sup>+</sup> 643.1122; found: 643.1128.

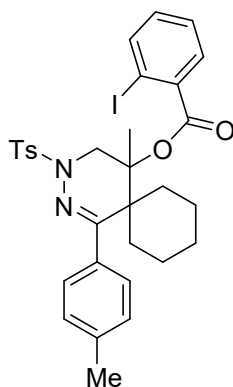

**5-Methyl-1-(*p*-tolyl)-3-tosyl-2,3-diazaspiro[5.5]undec-1-en-5-yl 2-iodobenzoate (2z)**

Yellow solid (48.8 mg, 70% yield). melting point: 173-175 °C. <sup>1</sup>H NMR (400 MHz, CDCl<sub>3</sub>, ppm): δ 7.83 (dd, *J* = 7.5, 1.9 Hz, 1H), 7.79-7.75 (m, 1H), 7.71 (dd, *J* = 11.8, 4.6 Hz, 4H), 7.40-7.32 (m, 4H), 7.29 (d, *J* = 0.9 Hz, 1H), 7.21 (td, *J* = 7.5, 2.0 Hz, 1H), 3.63 (d, *J* = 12.4 Hz, 1H), 3.38 (d, *J* = 12.4 Hz, 1H), 2.42 (s, 3H), 2.30 (s, 3H), 1.83-1.58 (m, 4H), 1.54-1.30 (m, 9H); <sup>13</sup>C NMR (100 MHz, CDCl<sub>3</sub>, ppm): 166.6, 165.8, 141.7, 141.5, 141.2, 137.9, 134.8, 132.3, 132.0, 130.8, 129.4, 129.3, 128.6, 127.9, 127.6, 96.3, 79.5, 50.8, 43.0, 31.8, 25.1, 22.1, 21.9, 21.4, 20.5; HRMS calcd for C<sub>31</sub>H<sub>34</sub>IN<sub>2</sub>O<sub>4</sub>S [M+H]<sup>+</sup> 657.1278; found: 657.1270.

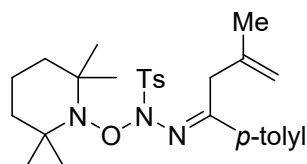

**(*E*)-4-methyl-*N'*-(3-methyl-1-tosylbut-3-en-1-ylidene)-*N*-((2,2,6,6-tetramethylpiperidin-1-yl)oxy)benzenesulfonohydrazide (3)**

Yellow solid (48.8 mg, 70% yield). melting point: 156-158 °C. <sup>1</sup>H NMR (400 MHz, CDCl<sub>3</sub>, ppm): 7.81-7.66 (m, 4H), 7.40 (s, 1H), 7.30 (d, *J* = 7.1 Hz, 3H), 4.85 (d, *J* = 8.0 Hz, 2H), 2.80 (s, 2H), 2.42 (s, 3H), 2.25 (s, 3H), 1.84 (d, *J* = 1.3 Hz, 3H), 1.59 (q, *J* = 7.0 Hz, 3H), 1.43 (t, *J* = 7.0 Hz, 4H), 0.92 (s, 12H); <sup>13</sup>C NMR (100 MHz, CDCl<sub>3</sub>, ppm): 164.4, 144.2, 141.7, 140.8, 139.0, 135.6, 129.3, 129.3, 127.7, 127.0, 114.4, 58.6, 43.2, 39.1, 28.6, 22.7, 21.6, 21.4, 17.5; HRMS calcd for C<sub>21</sub>H<sub>33</sub>N<sub>3</sub>O<sub>3</sub>S<sup>+</sup> [M+H]<sup>+</sup> 407.2237; found: 407.2235.

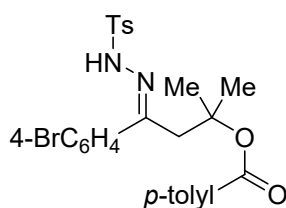



### (Z)-4-(4-bromophenyl)-2-methyl-4-(2-tosylhydrazono)butan-2-yl 4-methylbenzoate (6)

Yellow solid (5.4 mg, 5% yield). melting point: 139-141 °C.  $^1\text{H}$  NMR (400 MHz,  $\text{CDCl}_3$ , ppm): 10.50 (s, 1H), 7.88 (d,  $J = 7.4$  Hz, 2H), 7.73 (dd,  $J = 11.5, 7.6$  Hz, 4H), 7.64 (d,  $J = 7.6$  Hz, 2H), 7.39 (d,  $J = 6.7$  Hz, 2H), 7.19 (d,  $J = 6.9$  Hz, 2H), 2.47 (s, 2H), 2.42 (s, 3H), 2.30 (s, 3H), 1.52 (s, 6H);  $^{13}\text{C}$  NMR (100 MHz,  $\text{CDCl}_3$ , ppm): 163.6, 157.3, 144.6, 143.0, 136.5, 136.2, 132.0, 129.6, 129.5, 129.4, 128.0, 127.6, 127.0, 83.5, 40.3, 27.0, 21.4, 20.5; HRMS calcd for  $\text{C}_{26}\text{H}_{28}\text{BrN}_2\text{O}_4\text{S}^+ [\text{M}+\text{H}]^+$  543.0948; found: 543.0946.

### 5 X-ray of 2a Crystallography details

Compound **2a** was dissolved in MeOH and cold *n*-hexane was added, leaving to slow evaporation overnight to yield colorless needle. A suitable crystal was selected and mounted on a X-ray with Mo radiation ( $a = 8.3871(11)$ ,  $b = 16.0084(17)$ ,  $c = 19.7110(19)$ ) for cell determination and subsequent data collection at 296 K. Using SHELXL-2014, the structure was solved with the ShelXT11 structure solution program using Intrinsic Phasing and refined with the ShelXL12 refinement package using Least Squares minimisation. The solved structure of **2a** has been deposited in The Cambridge Crystallographic Data Centre (CCDC: 2271511)

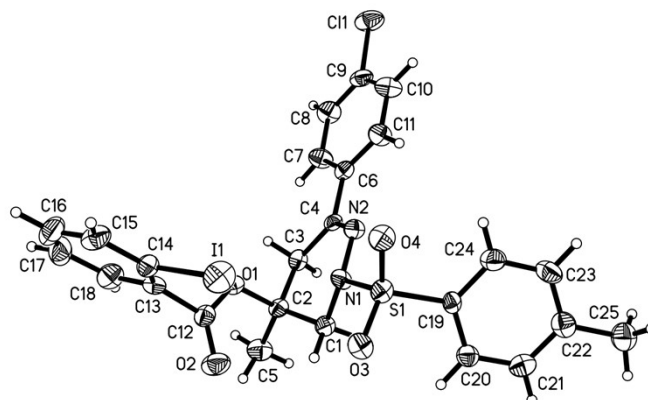

ORTEP view with ellipsoids (at the 50% probability level)

|                                                                                    |                                 |                      |
|------------------------------------------------------------------------------------|---------------------------------|----------------------|
| Bond precision:                                                                    | C-C = 0.0114 Å                  | Wavelength=1.54178   |
| Cell:                                                                              | a=8.3871(11)                    | b=16.0084(17)        |
|                                                                                    | alpha=90                        | beta=106.856(3)      |
|                                                                                    |                                 | gamma=90             |
| Temperature: 293 K                                                                 |                                 |                      |
|                                                                                    | Calculated                      | Reported             |
| Volume                                                                             | 2532.8(5)                       | 2532.8(5)            |
| Space group                                                                        | P 21/c                          | P2(1)/n              |
| Hall group                                                                         | -P 2ybc                         | ?                    |
| Moiety formula                                                                     | C25 H22 Cl I N2 O4 S            | ?                    |
| Sum formula                                                                        | C25 H22 Cl I N2 O4 S            | C25 H22 Cl I N2 O4 S |
| Mr                                                                                 | 608.86                          | 608.86               |
| Dx, g cm <sup>-3</sup>                                                             | 1.597                           | 1.597                |
| Z                                                                                  | 4                               | 4                    |
| Mu (mm <sup>-1</sup> )                                                             | 11.961                          | 11.961               |
| F000                                                                               | 1216.0                          | 1216.0               |
| F000'                                                                              | 1220.67                         |                      |
| h, k, lmax                                                                         | 9, 18, 23                       | 9, 18, 23            |
| Nref                                                                               | 4412                            | 4410                 |
| Tmin, Tmax                                                                         | 0.512, 0.620                    | 0.305, 0.646         |
| Tmin'                                                                              | 0.201                           |                      |
| Correction method= # Reported T Limits: Tmin=0.305 Tmax=0.646 AbsCorr = MULTI-SCAN |                                 |                      |
| Data completeness= 1.000                                                           | Theta(max)= 66.050              |                      |
| R(reflections)= 0.0628( 2505)                                                      | wR2(reflections)= 0.1209( 4410) |                      |
| S = 1.018                                                                          | Npar= 309                       |                      |

## 6 Reference

- (1) X.-Y. Duan, X. L. Yang, R. Fang, X.-X. Peng, W. Yu, B. Han, Hydrazone Radical Promoted Vicinal Difunctionalization of Alkenes and Trifunctionalization of Allyls: Synthesis of Pyrazolines and Tetrahydropyridazines, *J. Org. Chem.*, 2013, **78**, 10692-10704.
- (2) M. Chen, L.-J. Wang, P.-X. Ren, X.-Y. Hou, Z. Fang, M.-N. Han and W. Li, Copper-Catalyzed Diamination of Alkenes of Unsaturated Ketohydrazones with Amines, *Org. Lett.*, 2018, **20**, 510-513.
- (3) X.-Y. Duan, X.-L. Yang, P.-P. Jia, M. Zhang, B. Han, Hydrazone Radical-Participated Tandem Reaction: A Strategy for the Synthesis of Pyrazoline-Functionalized Oxindoles, *Org. Lett.*, 2015, **17**, 6022-6025.
- (4) X.-X. Peng, D. Wei, W.-J. Han, F. Chen, W. Yu, B. Han, Dioxygen Activation via Cu-Catalyzed Cascade Radical Reaction: An Approach to Isoxazoline/Cyclic Nitron-Featured  $\alpha$ -Ketols, *ACS Catal.*, 2017, **7**, 7830-7834.
- (5) X. Peng, A. Kaga, H. Hirao, S. Chiba, Hydroamination of Alkenyl *N*-Arylhydrazones Mediated by *t*-BuOK for the Synthesis of Nitrogen Heterocycles, *Org. Chem. Front.*, 2016, **3**, 609-613.

(6) D.-F. Jiang, J.-Y. Hu, W.-J. Hao, S.-L. Wang, S.-J. Tu and B. Jiang, Tunable Cu(I)-Catalyzed Site-Selective Dehydrogenative Amination of  $\beta,\gamma$ -Unsaturated Hydrazones for Divergent Synthesis of Pyrazol-4-ones and 1,6-Dihydropyridazines, *Org. Chem. Front.*, 2018, **5**, 189-196.

## 7 Copies of NMR Spectra

$^1\text{H}$  NMR of **2a** (400 MHz,  $\text{CDCl}_3$ ):

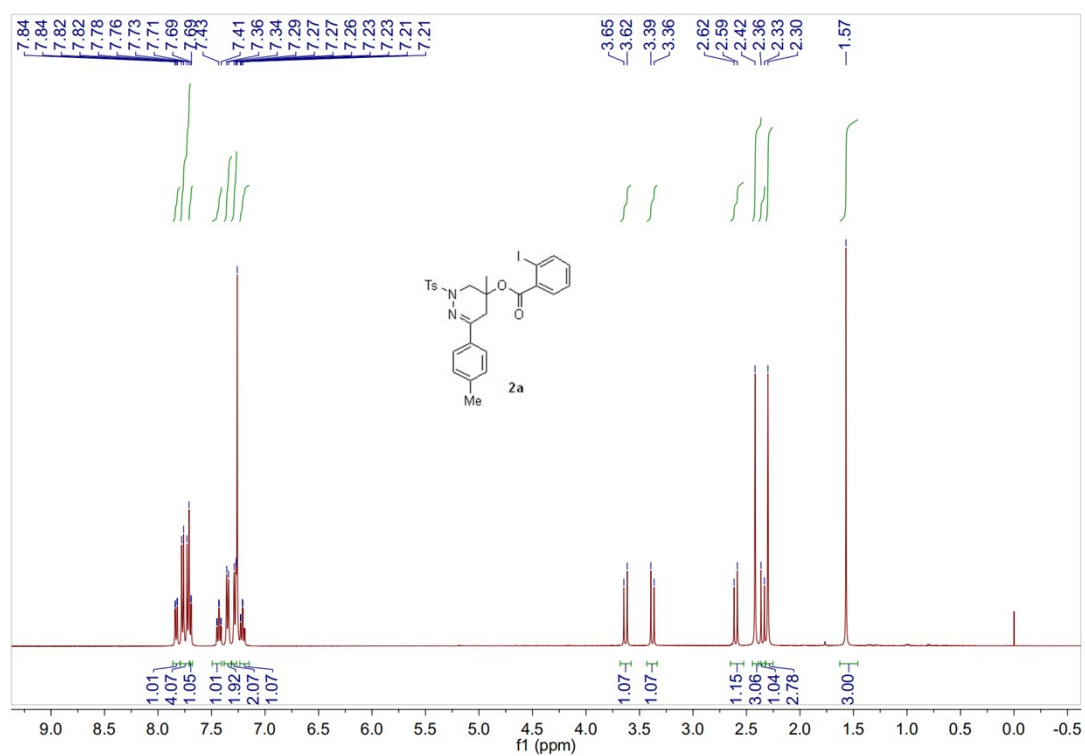

$^{13}\text{C}$  NMR of **2a** (100 MHz,  $\text{CDCl}_3$ ):

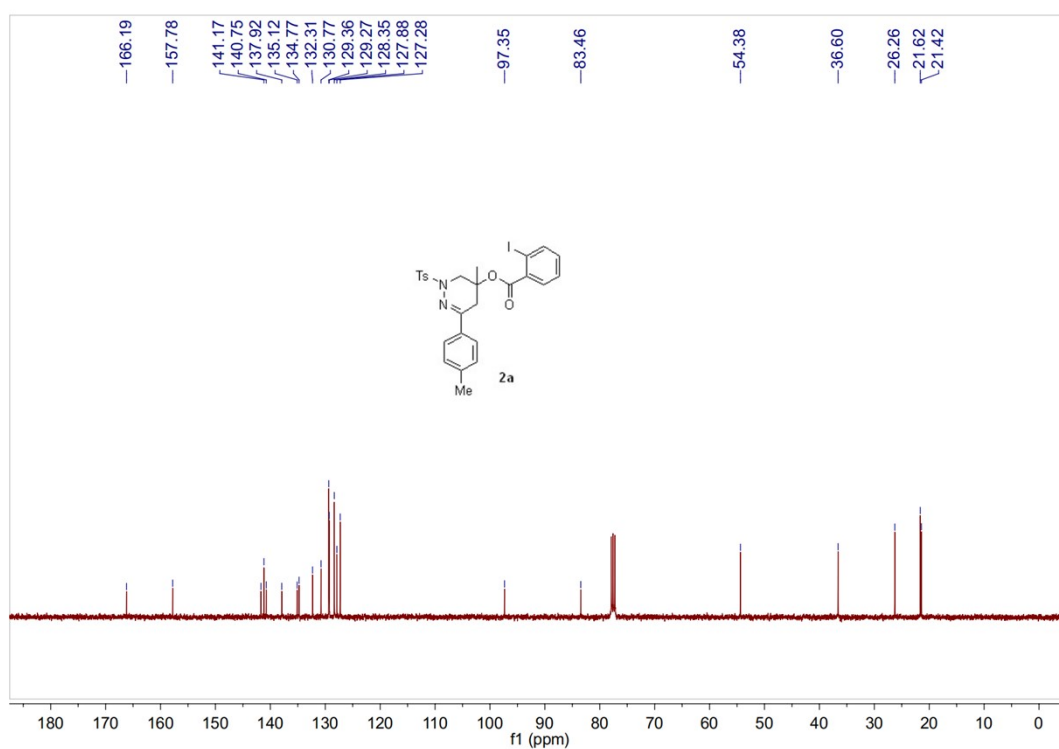

$^1\text{H}$  NMR of **2b** (400 MHz,  $\text{CDCl}_3$ ):

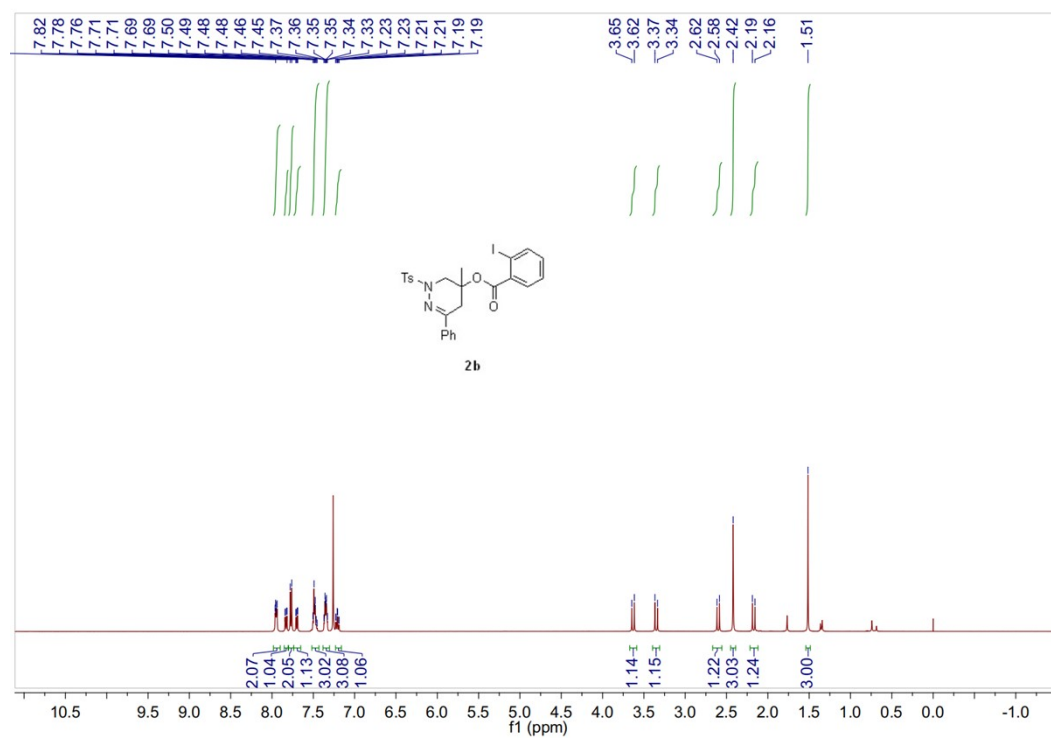

$^{13}\text{C}$  NMR of **2b** (100 MHz,  $\text{CDCl}_3$ ):

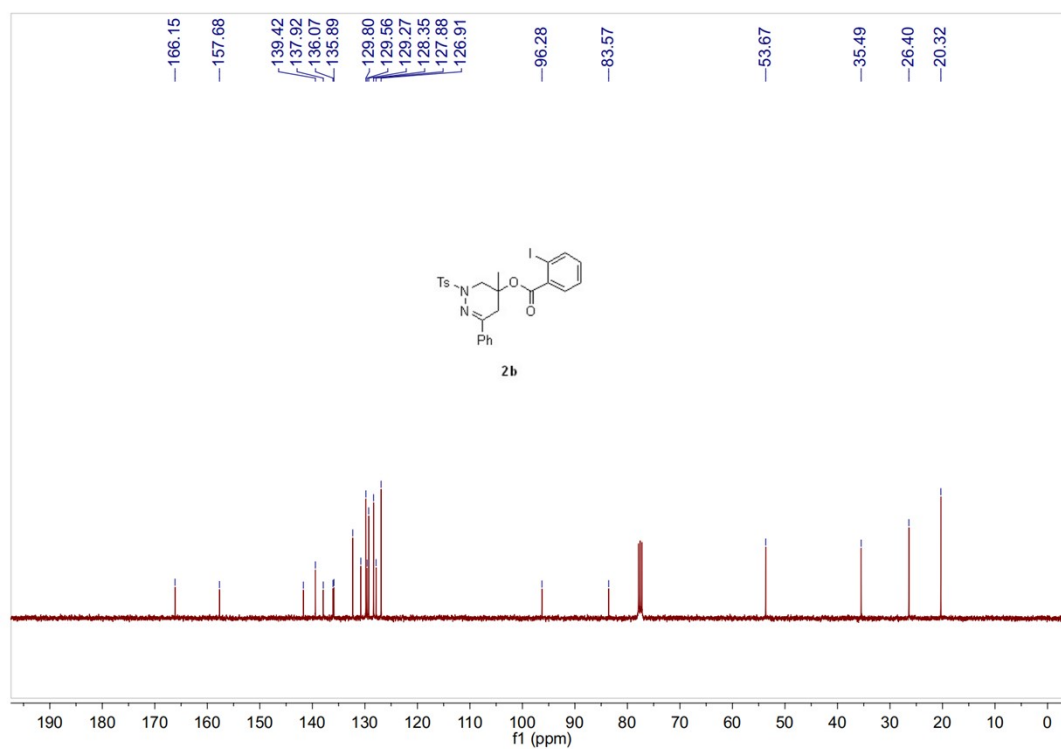

$^1\text{H}$  NMR of **2c** (400 MHz,  $\text{CDCl}_3$ ):

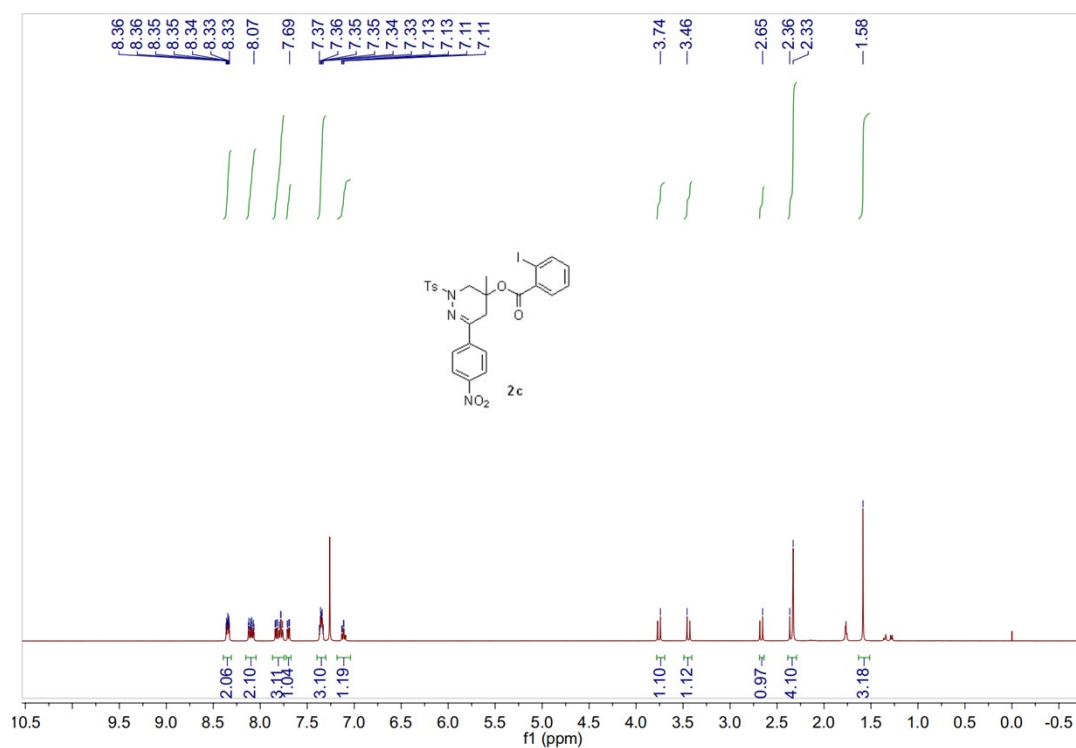

$^{13}\text{C}$  NMR of **2c** (100 MHz,  $\text{CDCl}_3$ ):

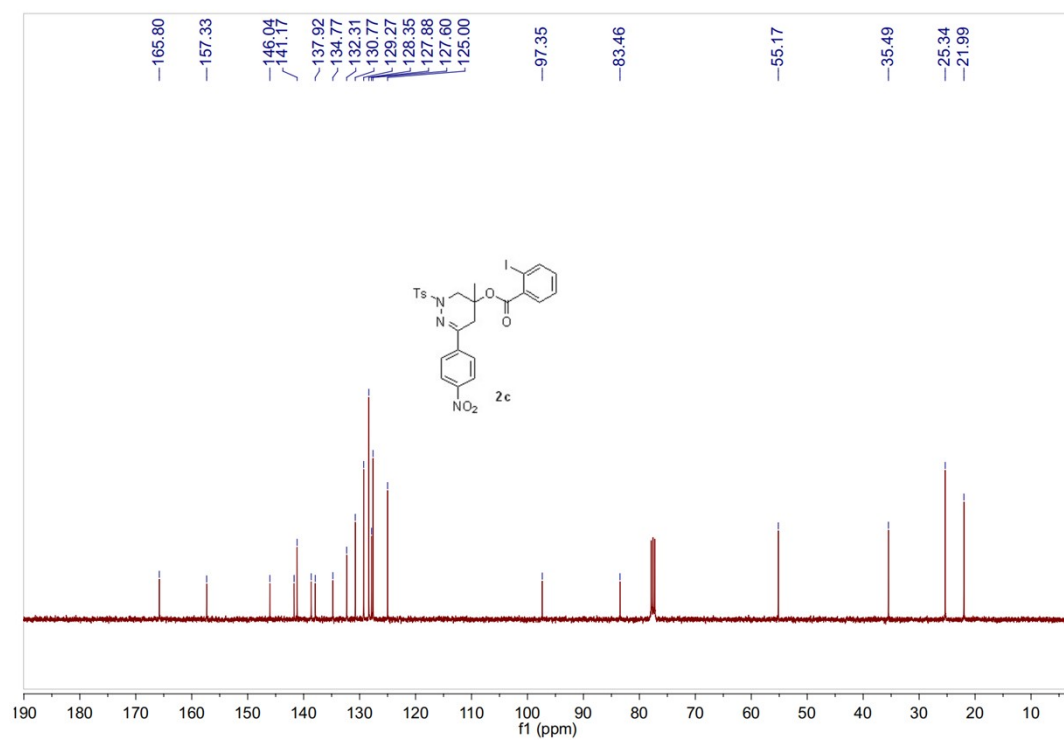

$^1\text{H}$  NMR of **2d** (400 MHz,  $\text{CDCl}_3$ ):

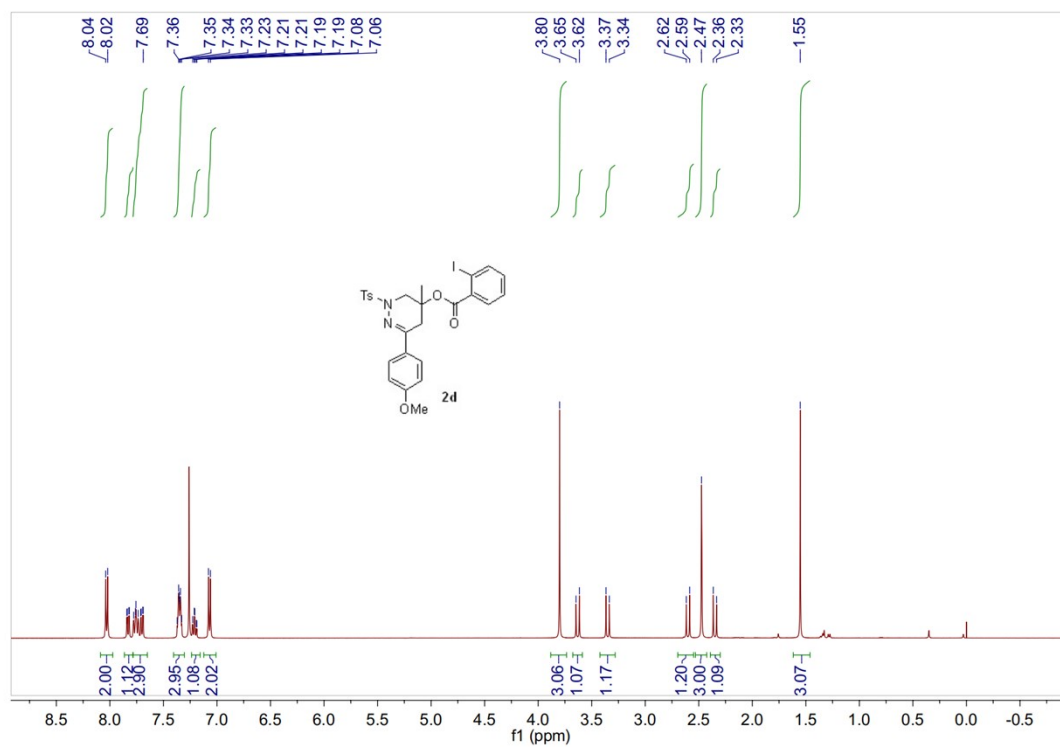

$^{13}\text{C}$  NMR of **2d** (100 MHz,  $\text{CDCl}_3$ ):

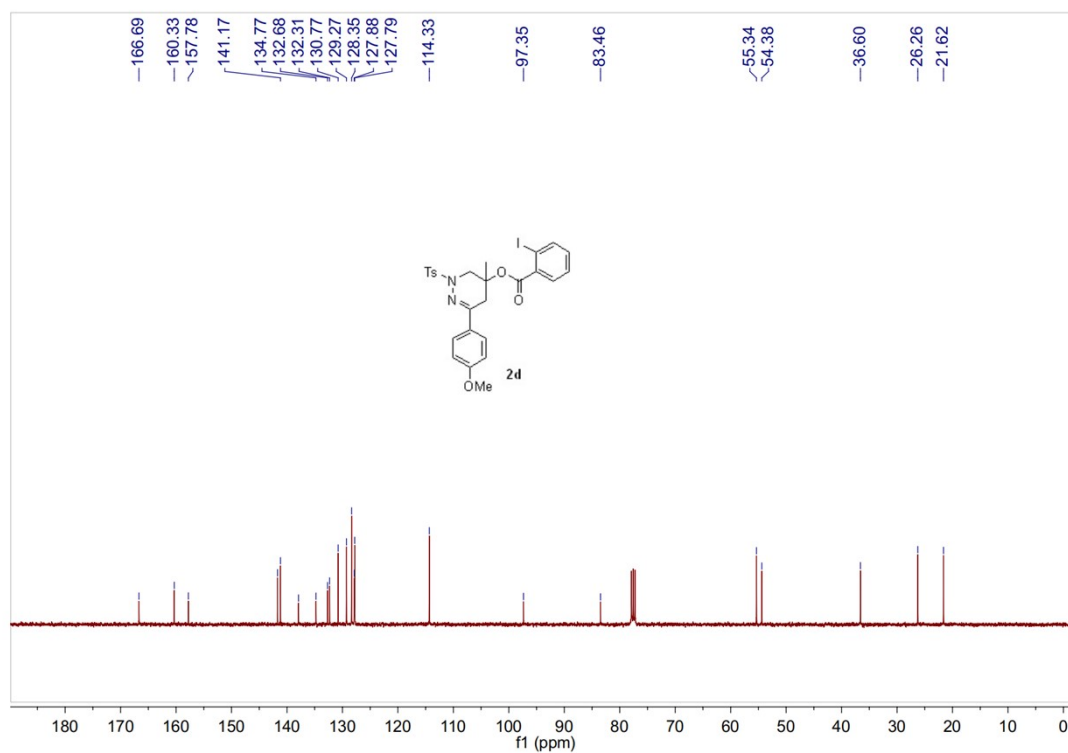

$^1\text{H}$  NMR of **2e** (400 MHz,  $\text{CDCl}_3$ ):

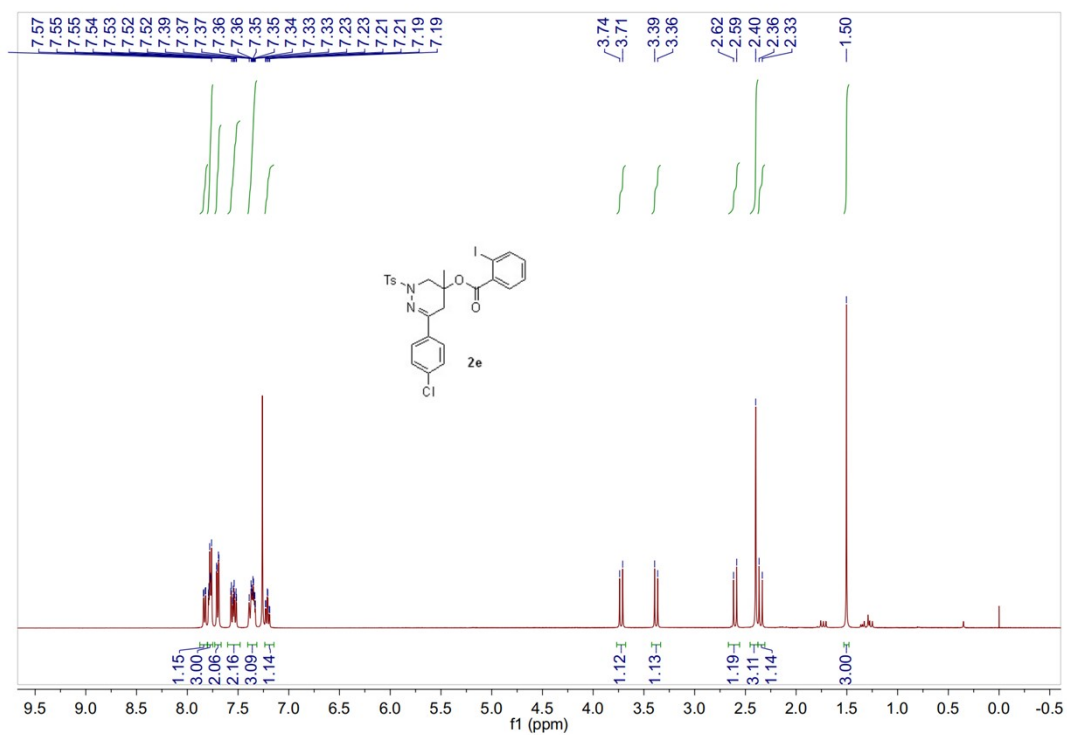

$^{13}\text{C}$  NMR of **2e** (100 MHz,  $\text{CDCl}_3$ ):

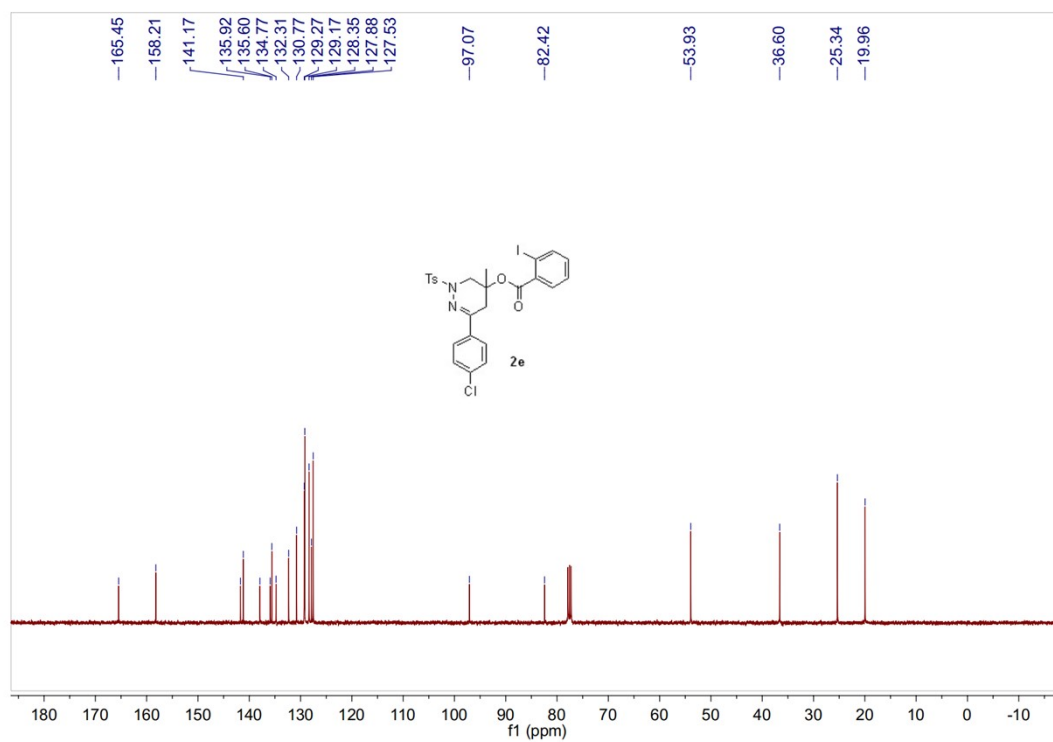



$^1\text{H}$  NMR of **2f** (400 MHz,  $\text{CDCl}_3$ ):

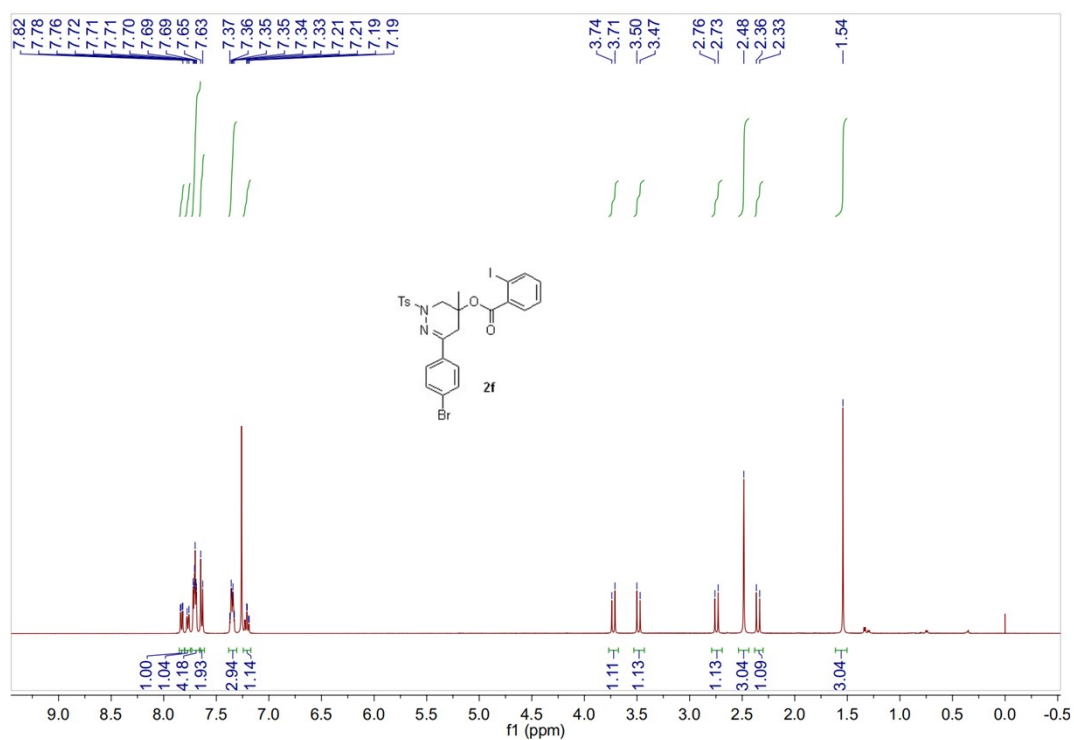

$^{13}\text{C}$  NMR of **2f** (100 MHz,  $\text{CDCl}_3$ ):

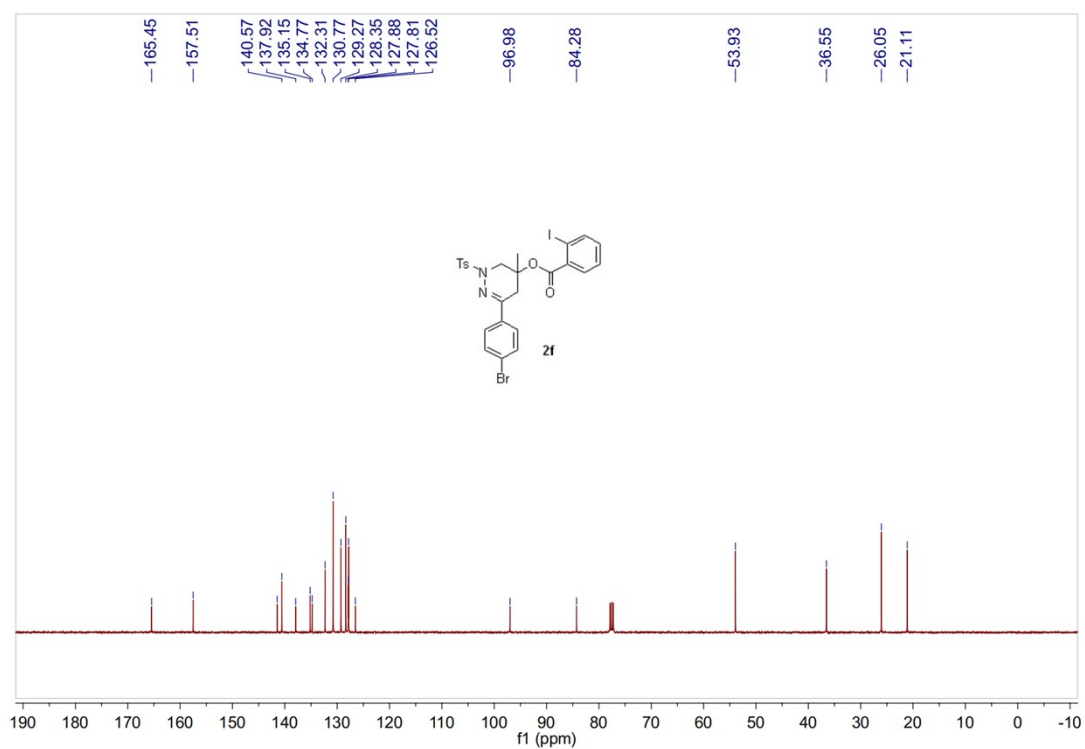

$^1\text{H}$  NMR of **2g** (400 MHz,  $\text{CDCl}_3$ ):

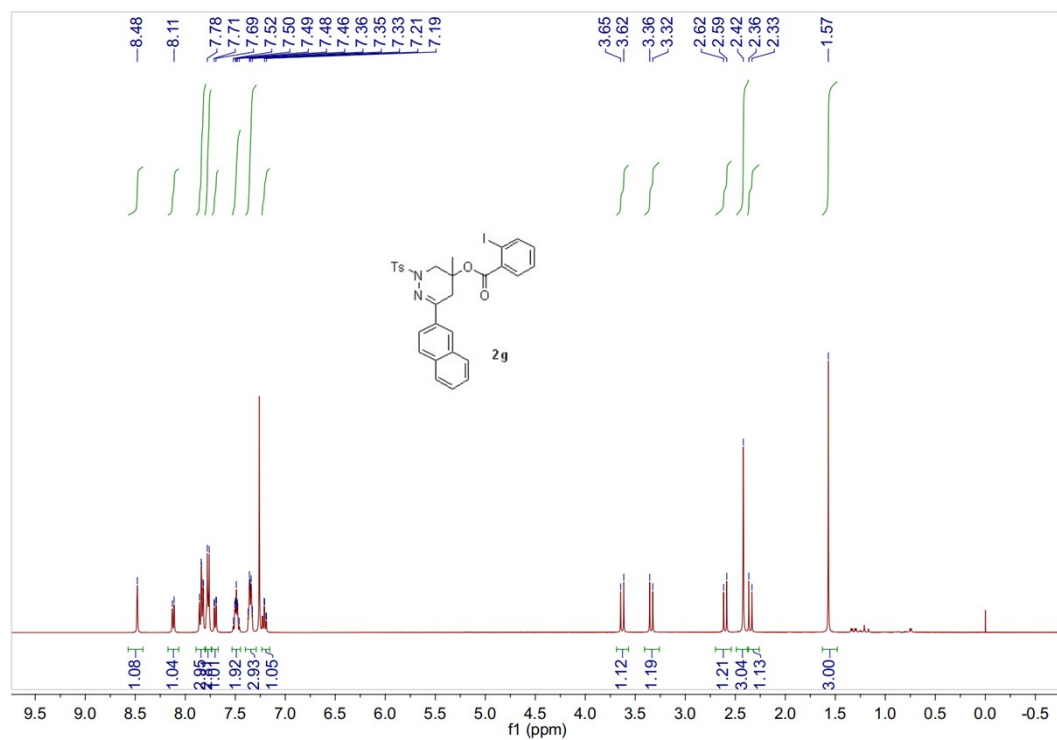

$^{13}\text{C}$  NMR of **2g** (100 MHz,  $\text{CDCl}_3$ ):

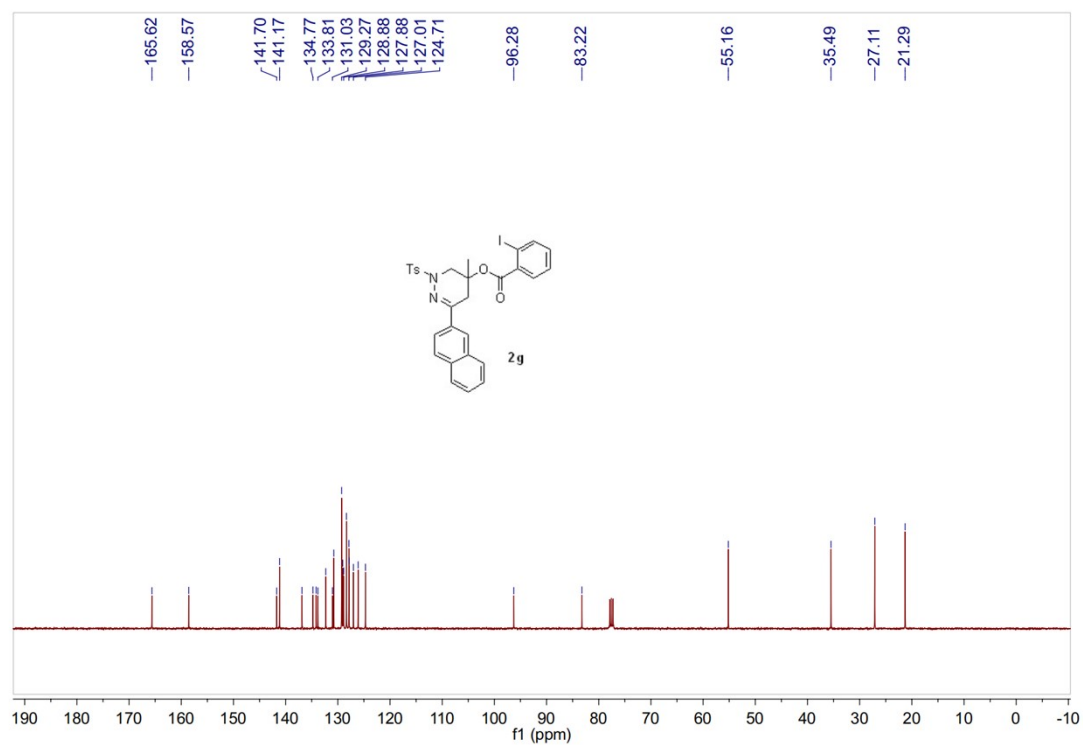

$^1\text{H}$  NMR of **2h** (400 MHz,  $\text{CDCl}_3$ ):

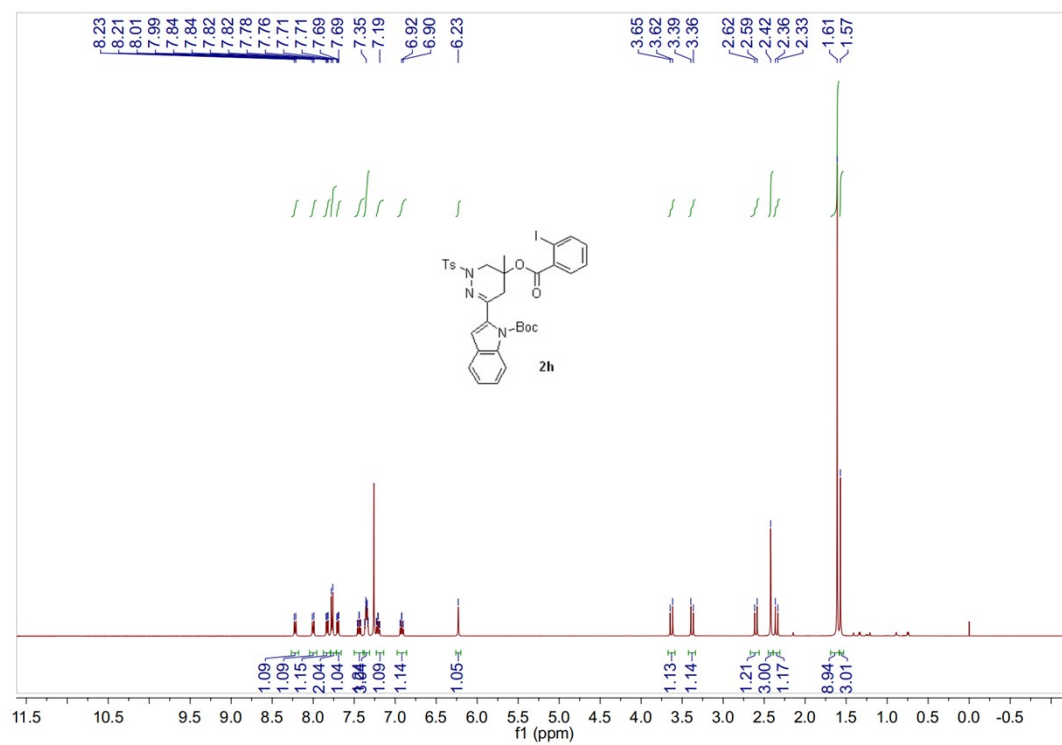

$^{13}\text{C}$  NMR of **2h** (100 MHz,  $\text{CDCl}_3$ ):

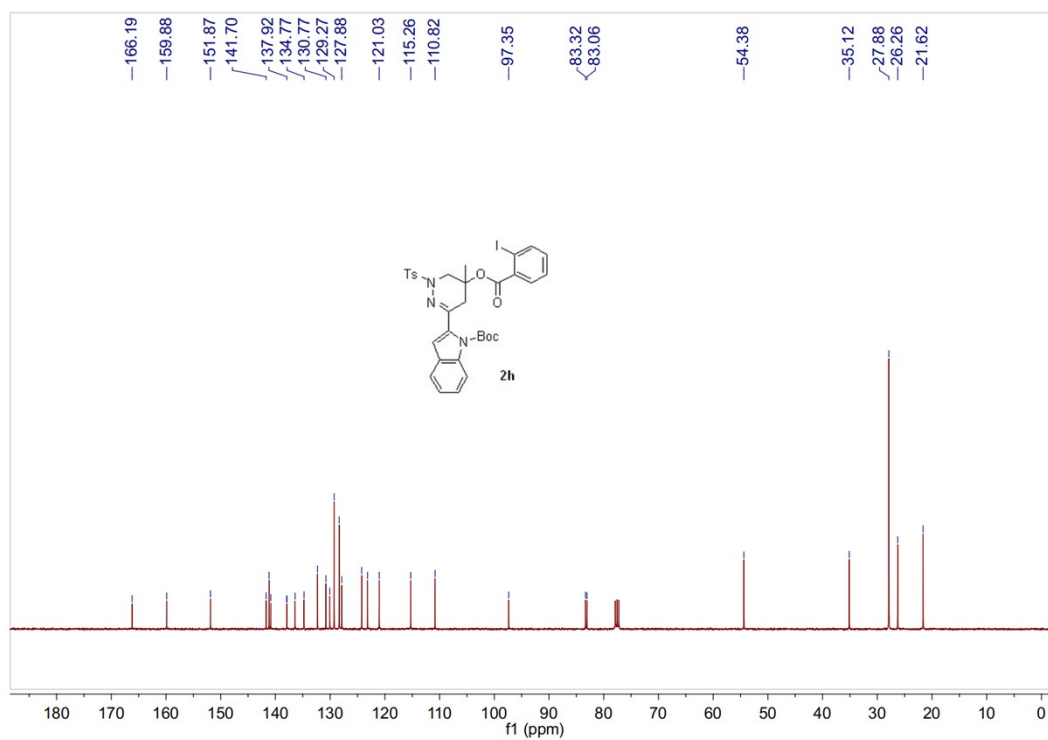

$^1\text{H}$  NMR of **2i** (400 MHz,  $\text{CDCl}_3$ ):

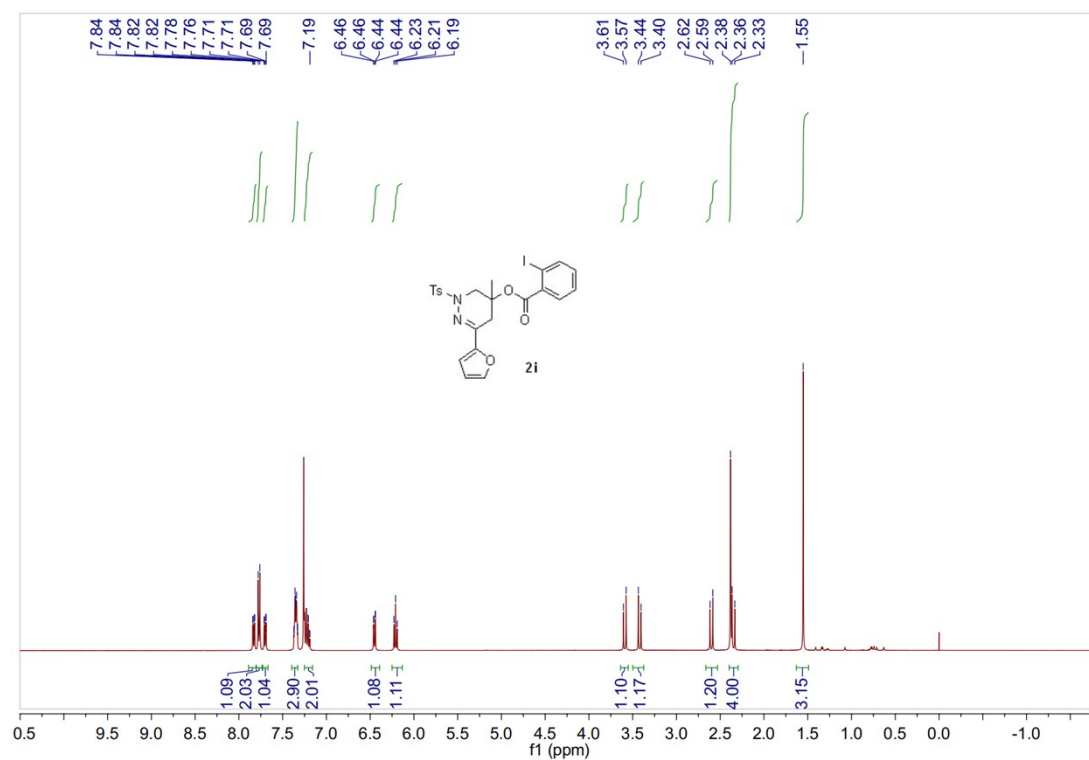

$^{13}\text{C}$  NMR of **2i** (100 MHz,  $\text{CDCl}_3$ ):

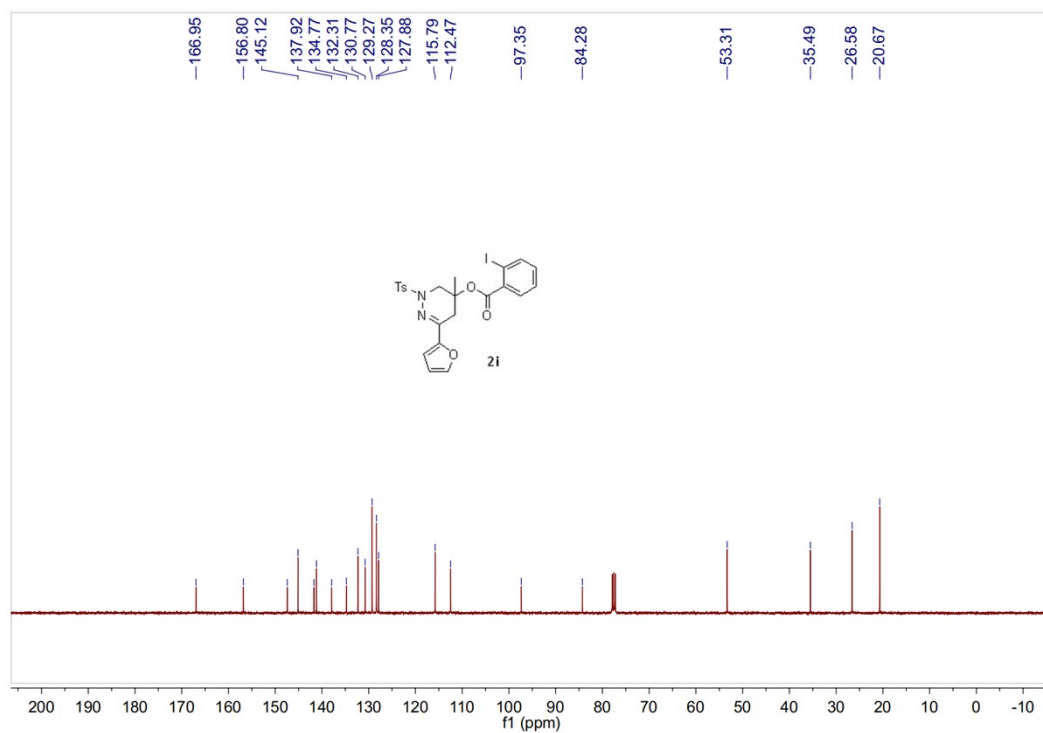

$^1\text{H}$  NMR of **2j** (400 MHz,  $\text{CDCl}_3$ ):

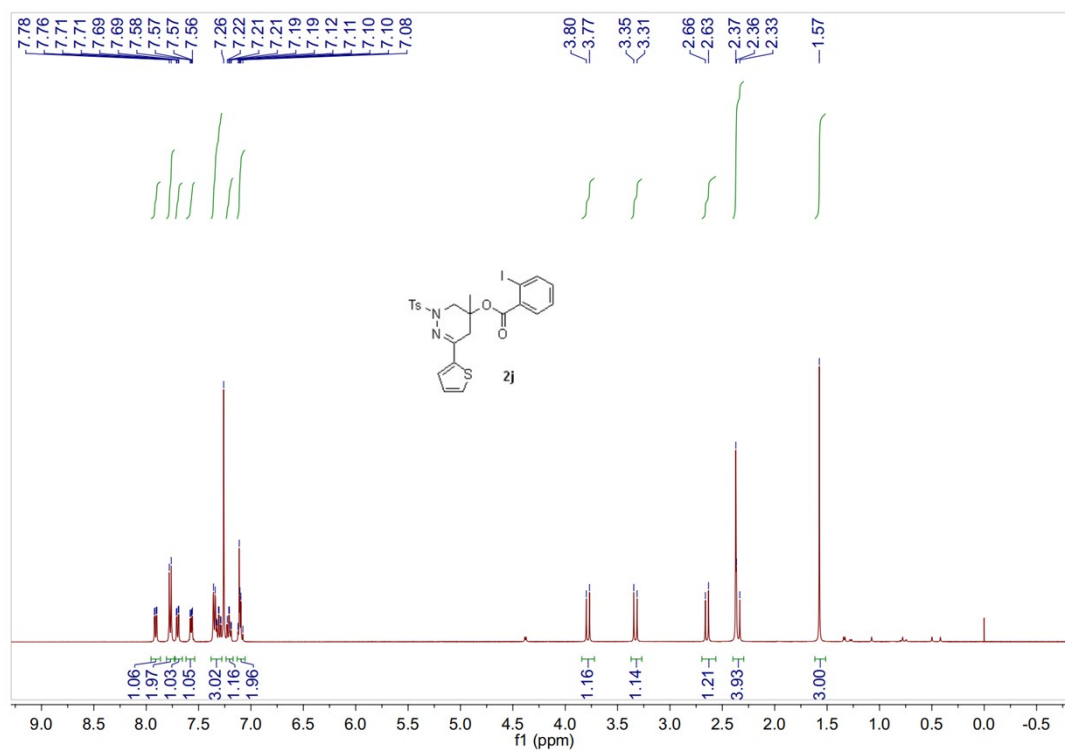

$^{13}\text{C}$  NMR of **2j** (100 MHz,  $\text{CDCl}_3$ ):

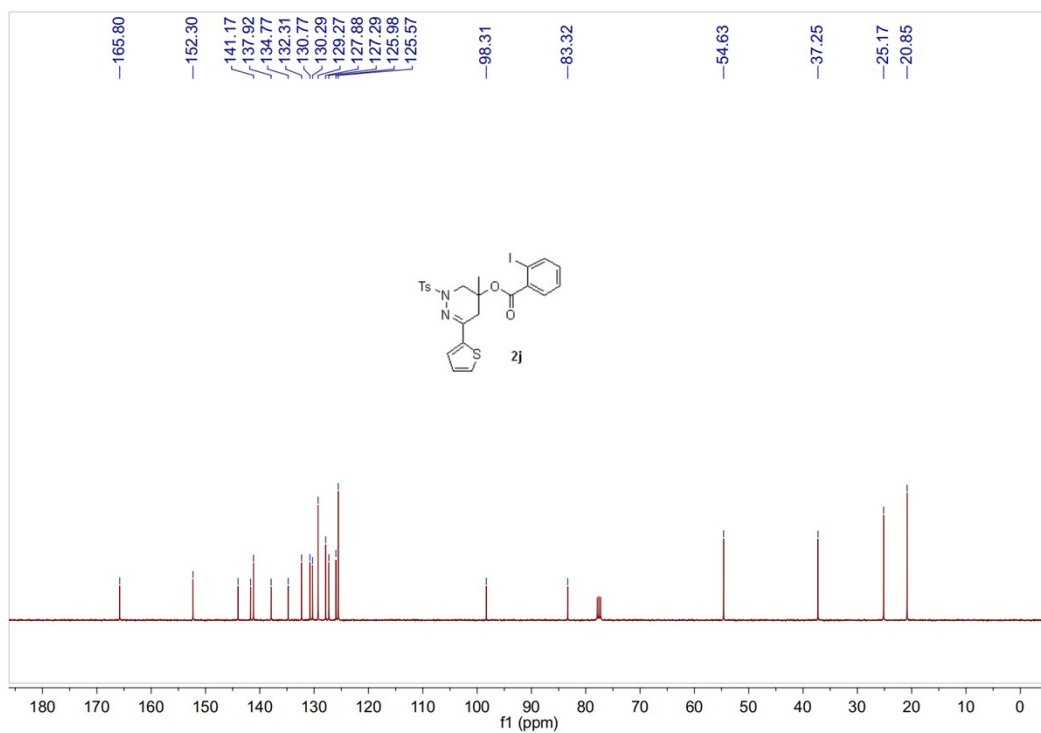

$^1\text{H}$  NMR of **2k** (400 MHz,  $\text{CDCl}_3$ ):

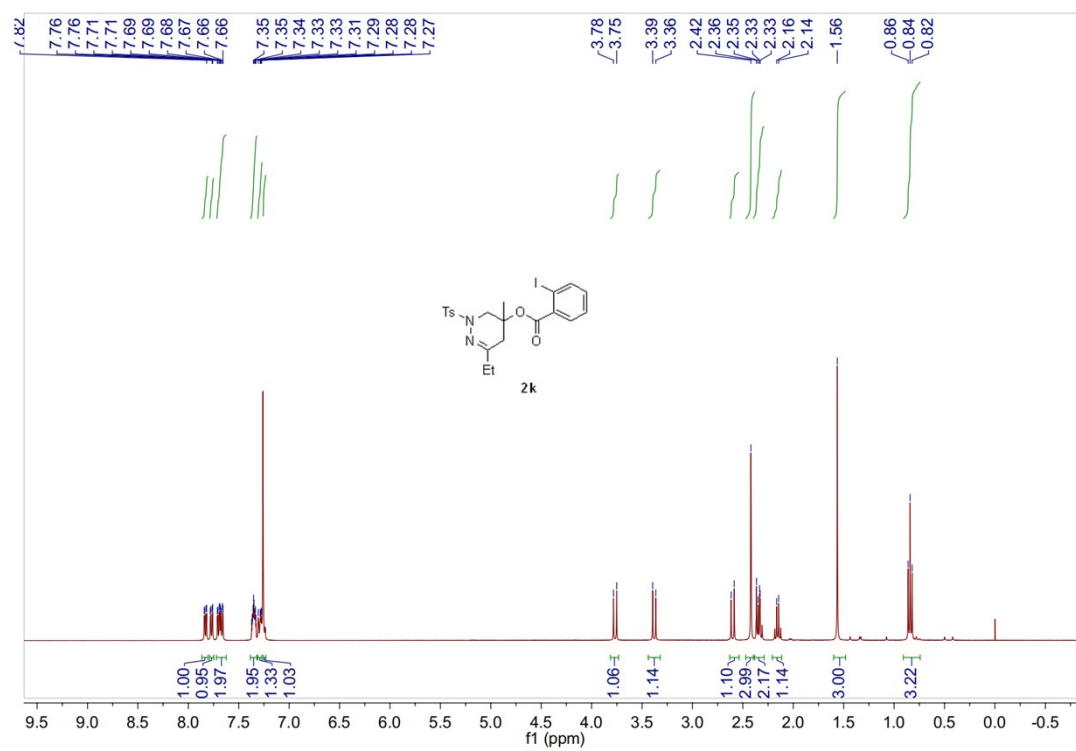

$^{13}\text{C}$  NMR of **2k** (100 MHz,  $\text{CDCl}_3$ ):

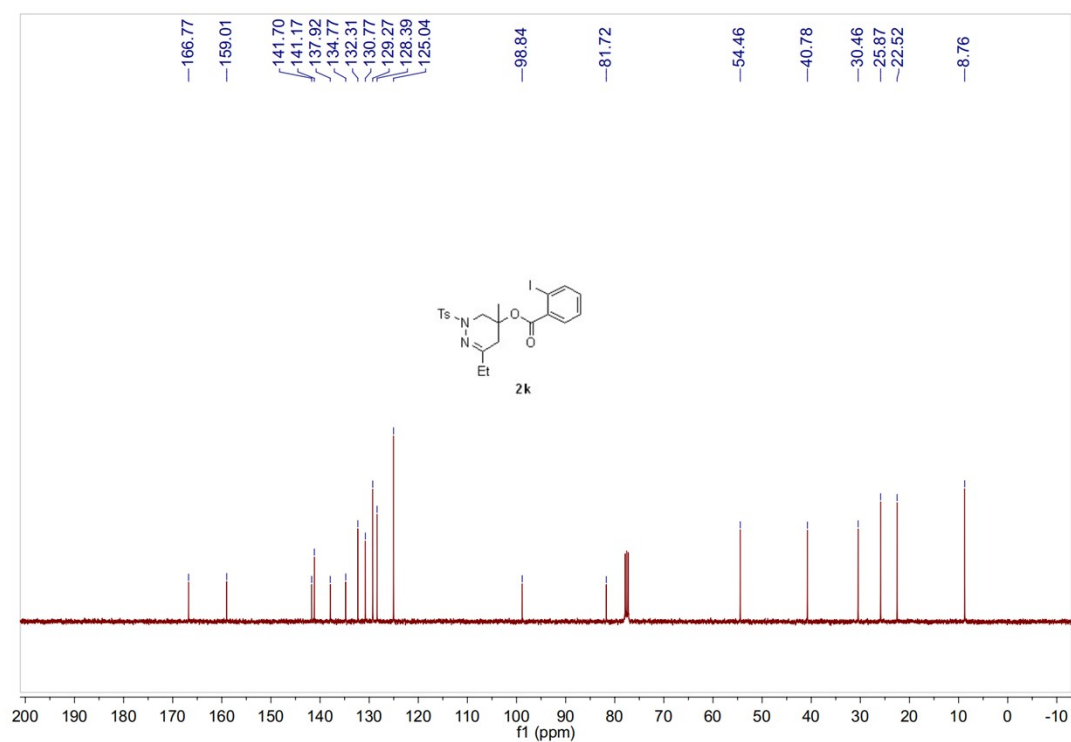

$^1\text{H}$  NMR of **21** (400 MHz,  $\text{CDCl}_3$ ):

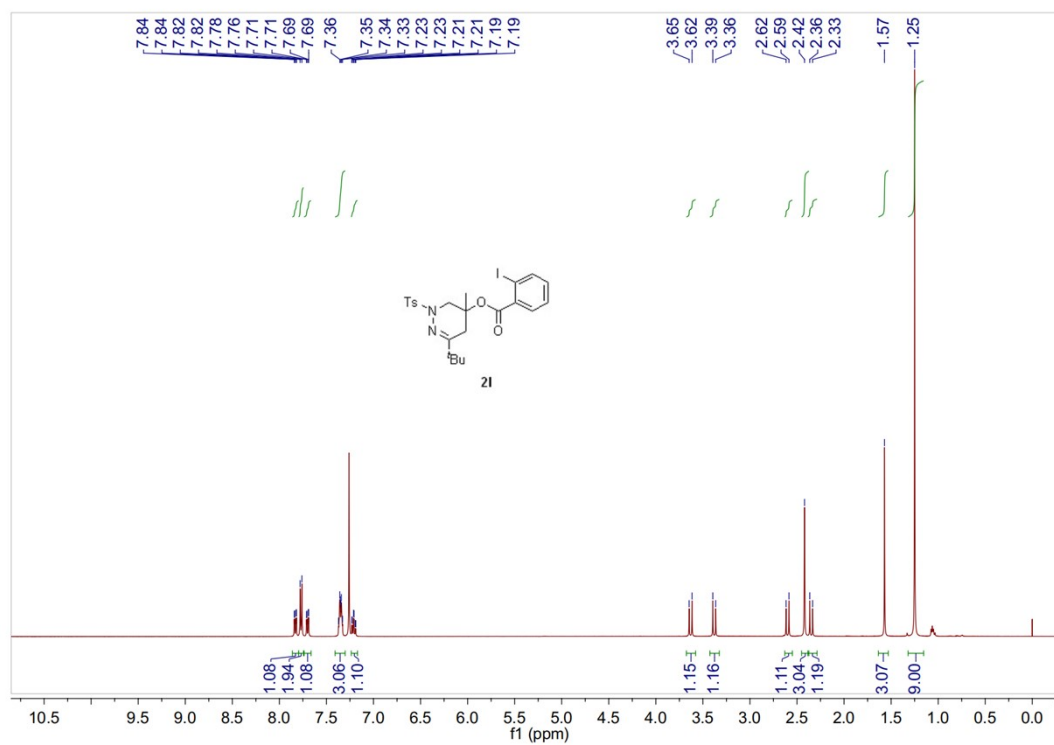

$^{13}\text{C}$  NMR of **21** (100 MHz,  $\text{CDCl}_3$ ):

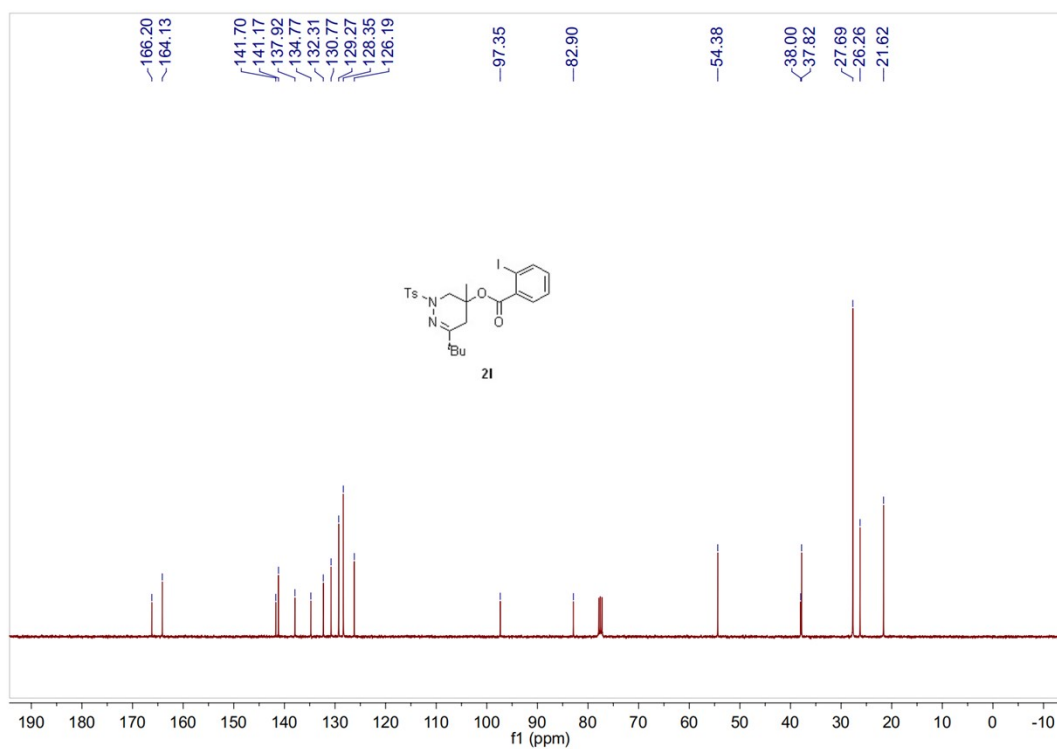

$^1\text{H}$  NMR of **2m** (400 MHz,  $\text{CDCl}_3$ ):

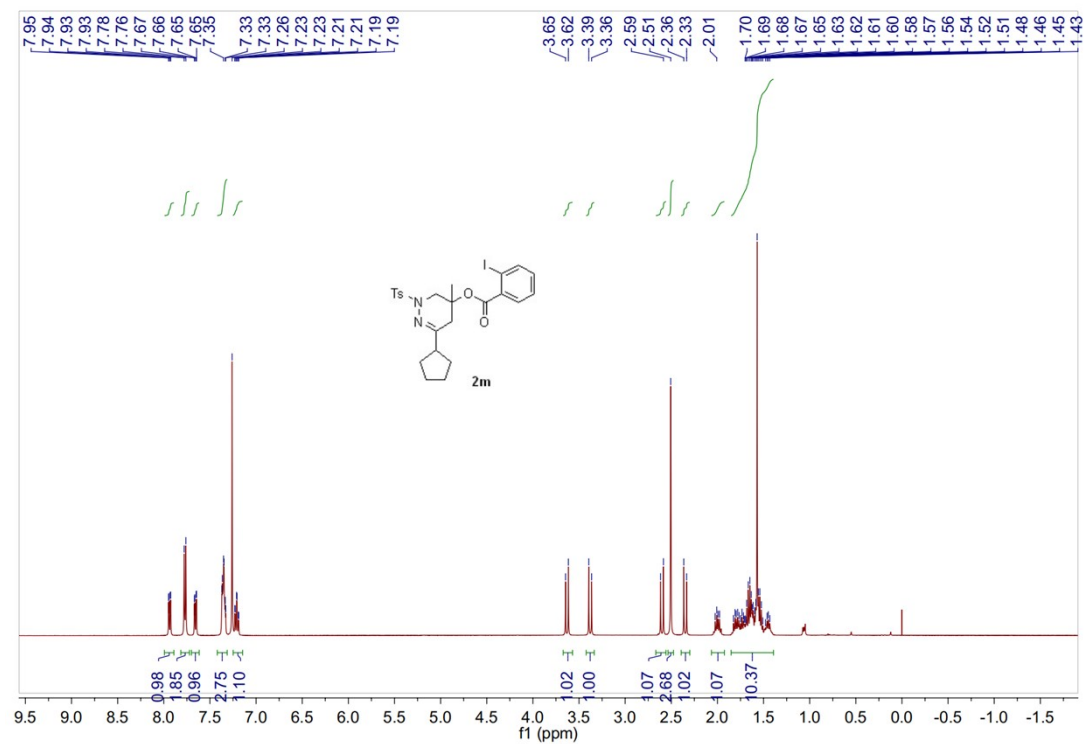

$^{13}\text{C}$  NMR of **2m** (100 MHz,  $\text{CDCl}_3$ ):

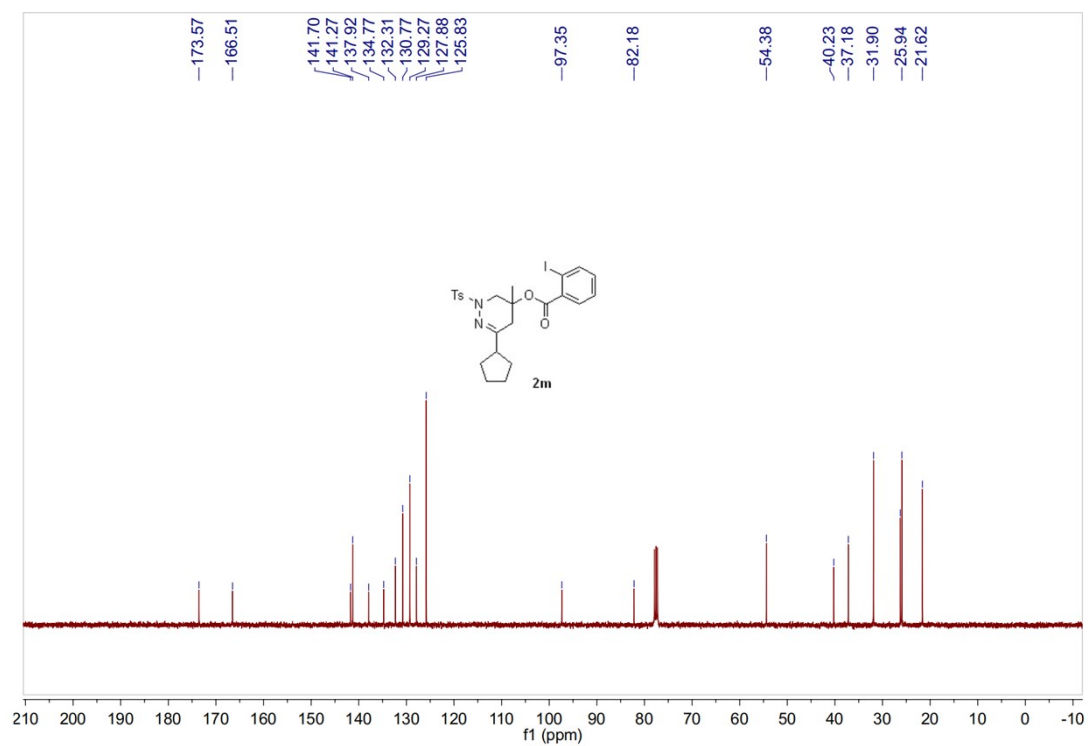



$^1\text{H}$  NMR of **2n** (400 MHz,  $\text{CDCl}_3$ ):

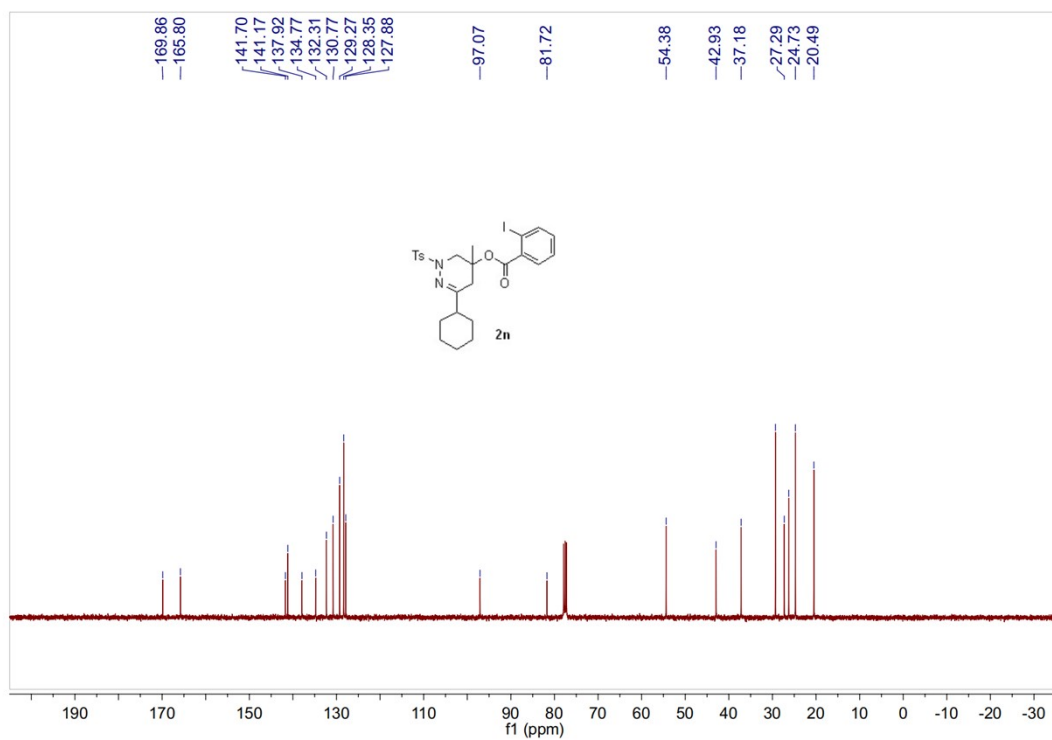

$^{13}\text{C}$  NMR of **2n** (100 MHz,  $\text{CDCl}_3$ ):

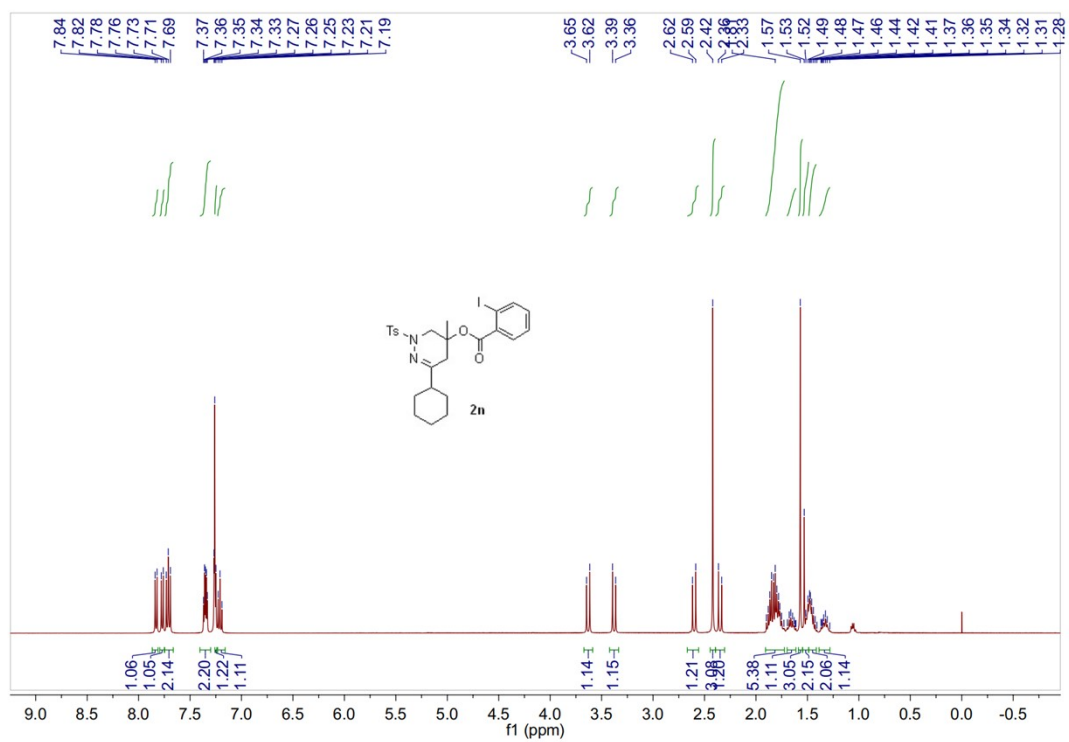

$^1\text{H}$  NMR of **2o** (400 MHz,  $\text{CDCl}_3$ ):

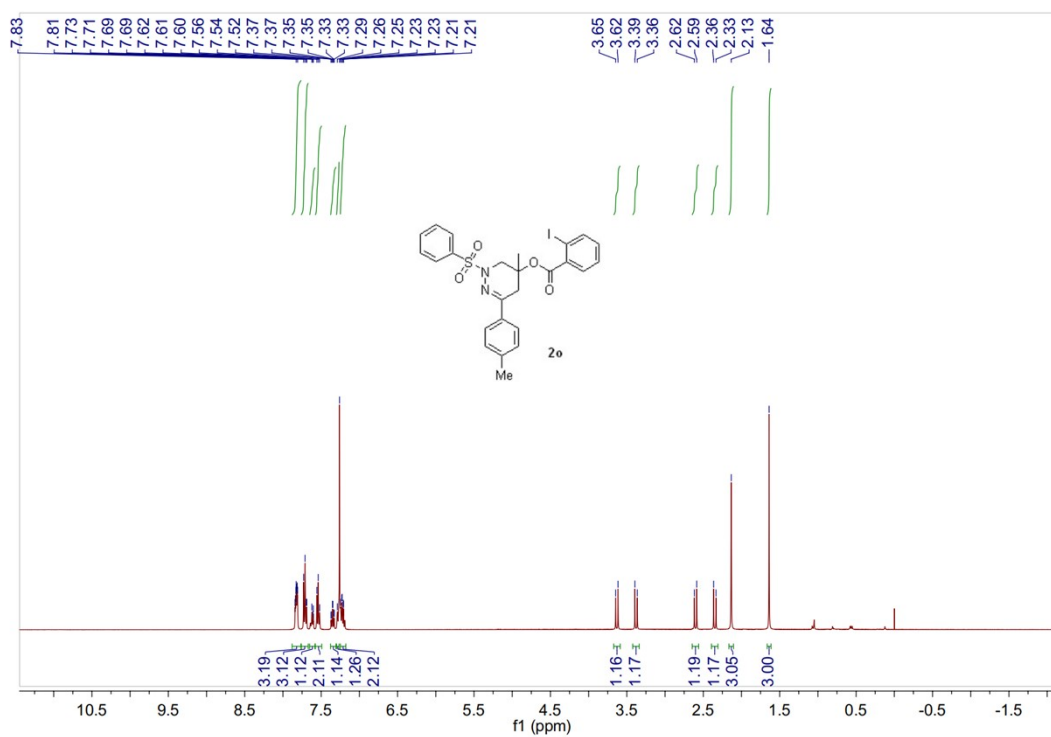

$^{13}\text{C}$  NMR of **2o** (100 MHz,  $\text{CDCl}_3$ ):

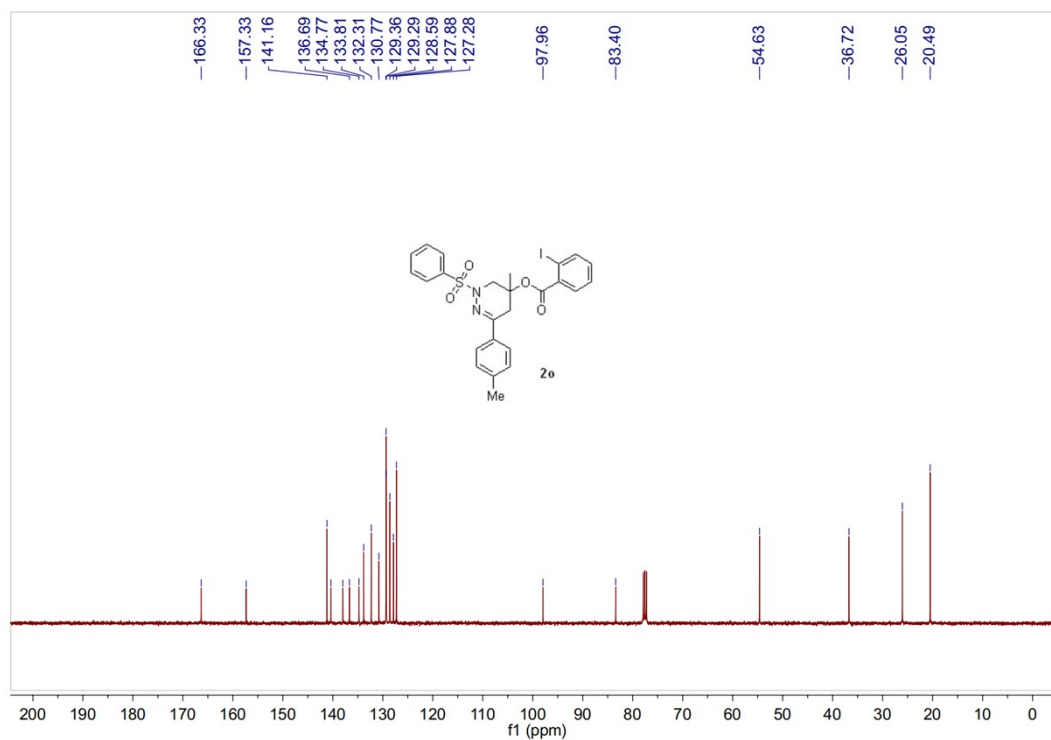

$^1\text{H}$  NMR of **2p** (400 MHz,  $\text{CDCl}_3$ ):

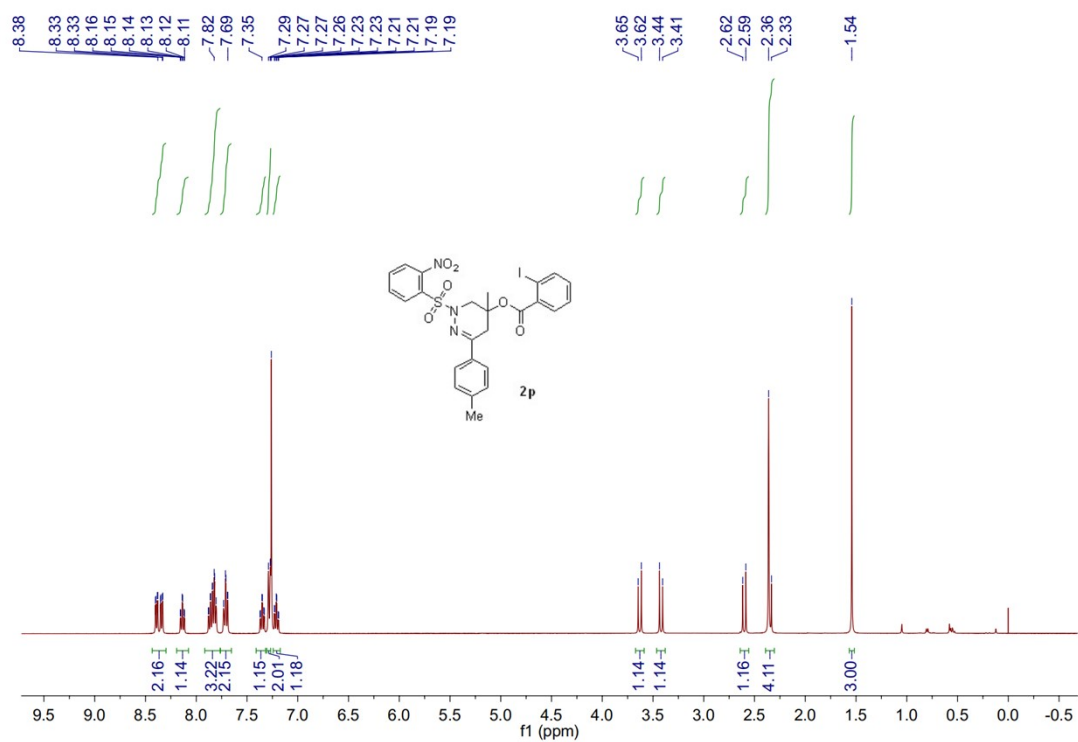

$^{13}\text{C}$  NMR of **2p** (100 MHz,  $\text{CDCl}_3$ ):

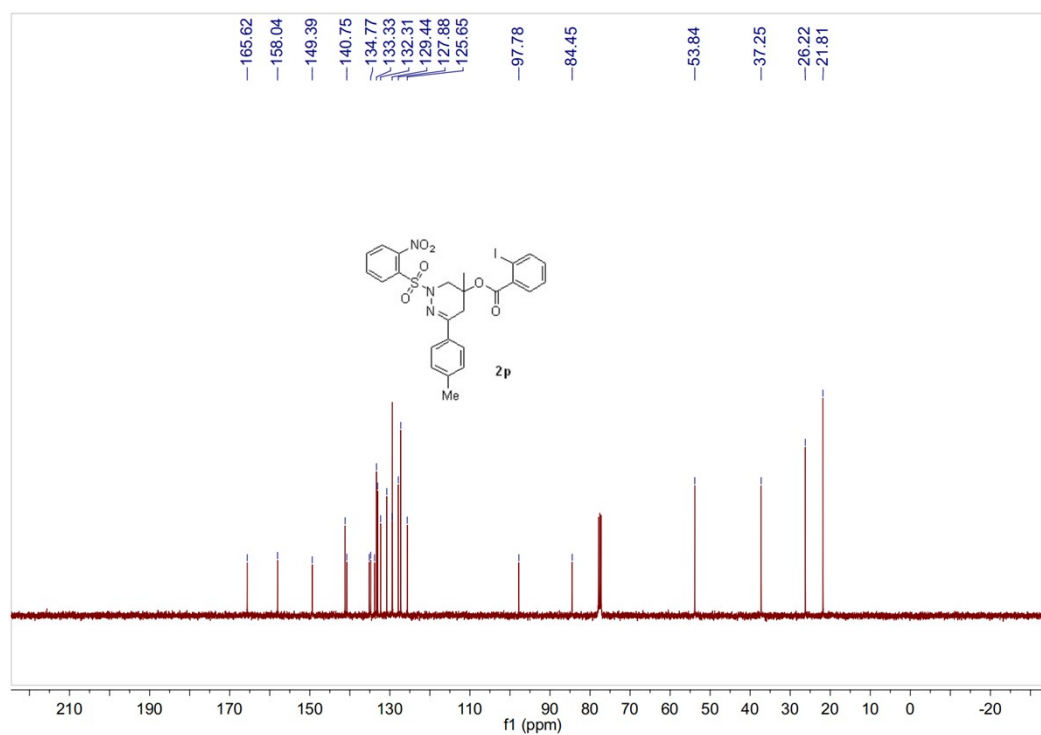

$^1\text{H}$  NMR of **2q** (400 MHz,  $\text{CDCl}_3$ ):

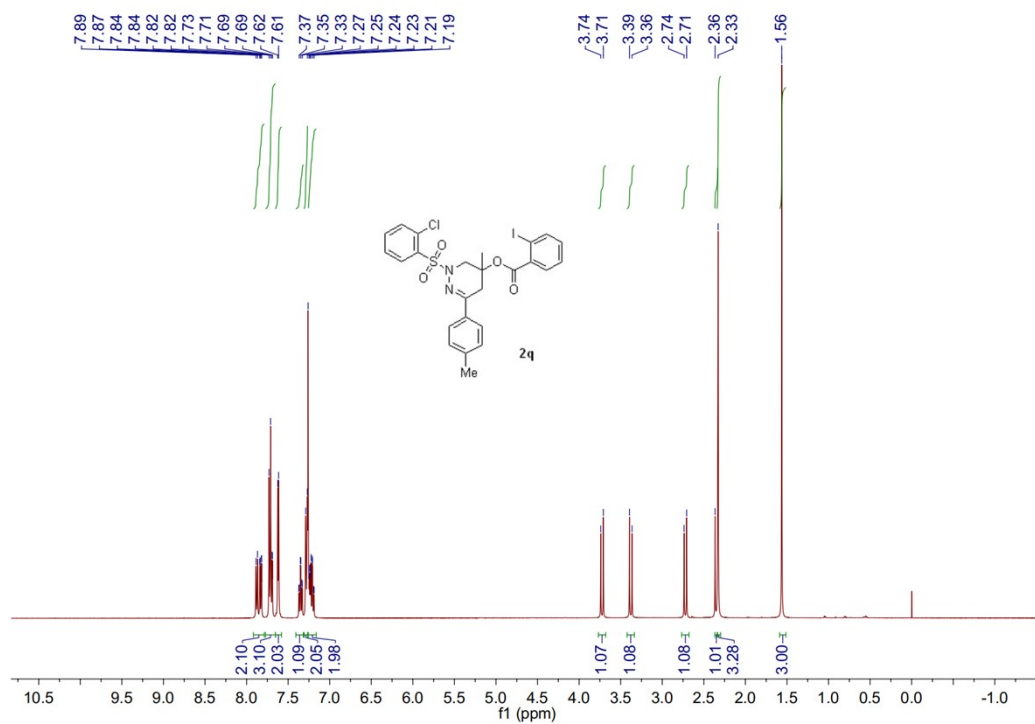

$^{13}\text{C}$  NMR of **2q** (100 MHz,  $\text{CDCl}_3$ ):

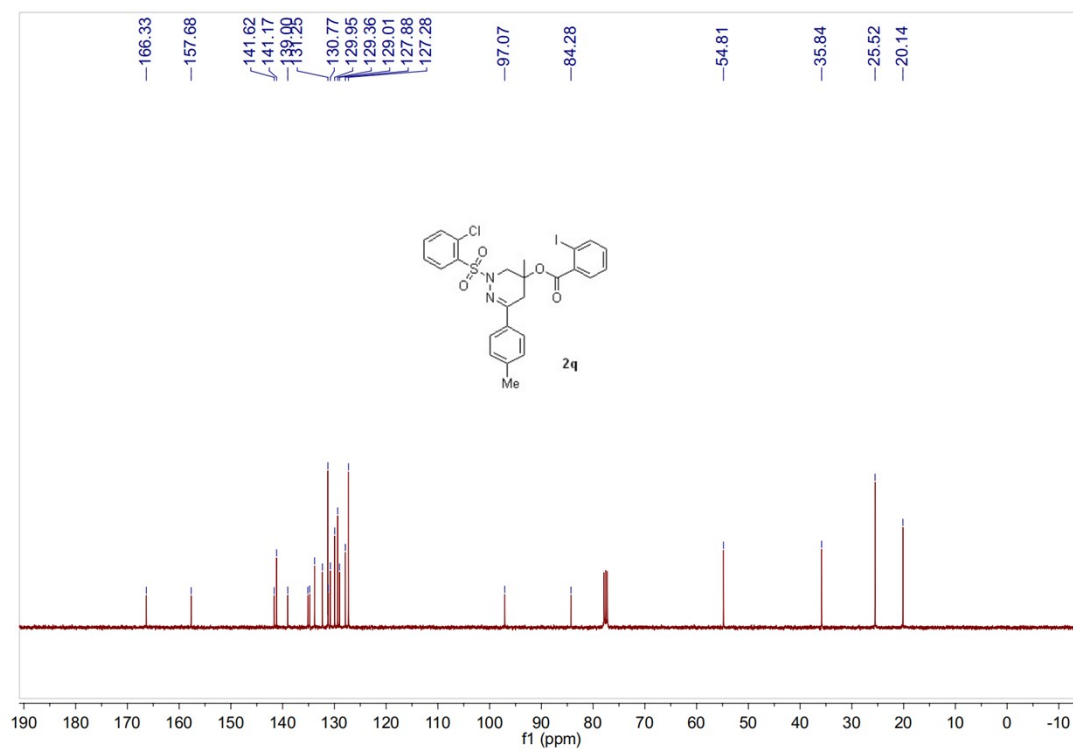

$^1\text{H}$  NMR of **2r** (400 MHz,  $\text{CDCl}_3$ ):

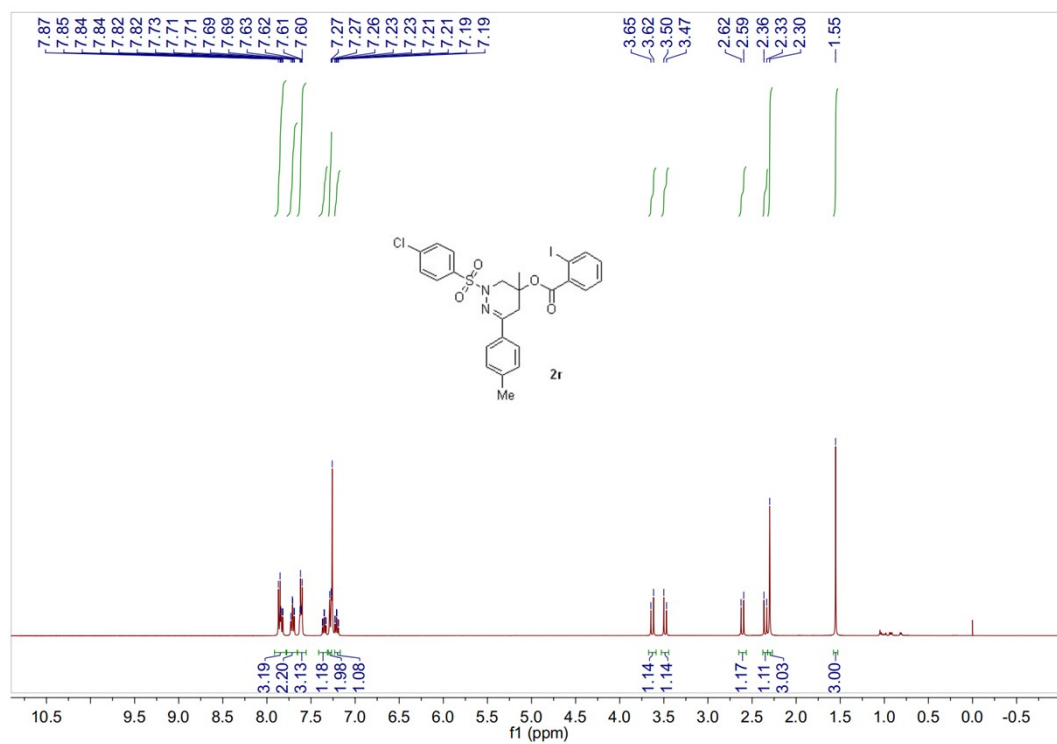

$^{13}\text{C}$  NMR of **2r** (100 MHz,  $\text{CDCl}_3$ ):

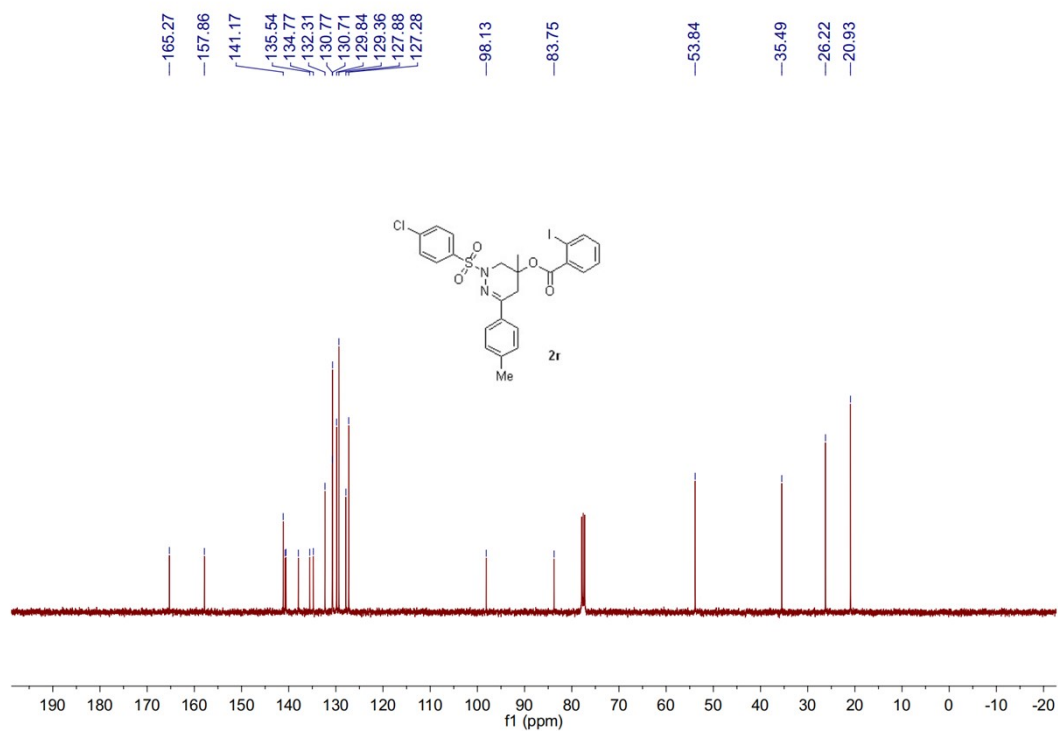

$^1\text{H}$  NMR of **2s** (400 MHz,  $\text{CDCl}_3$ ):

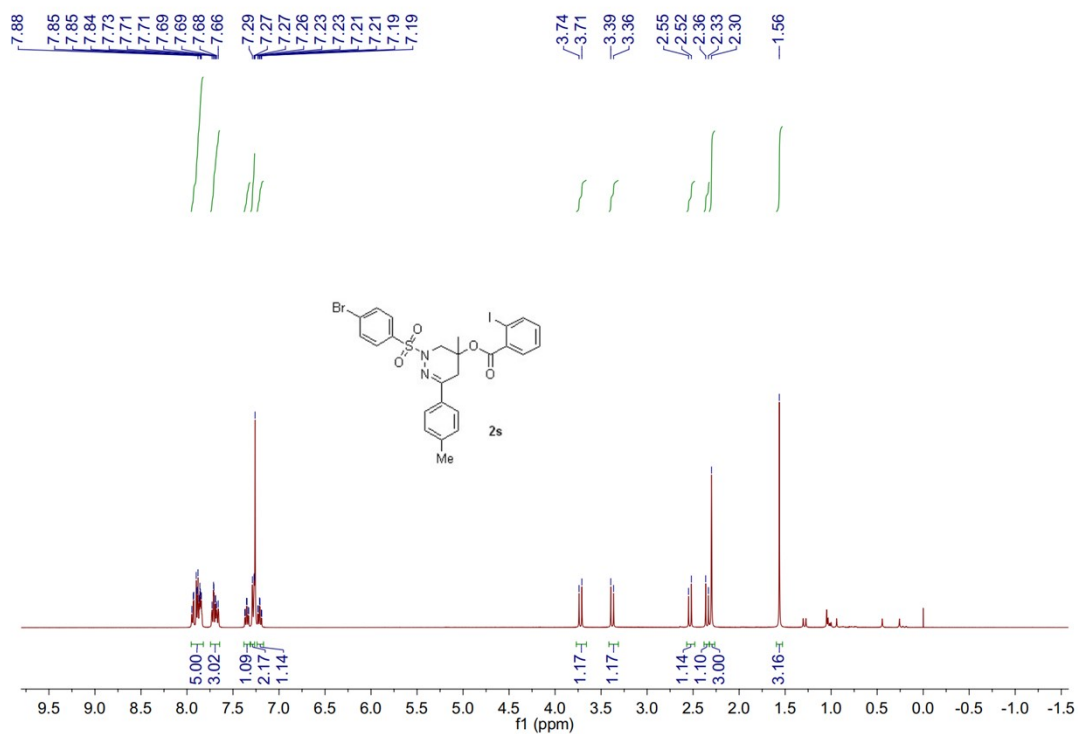

$^{13}\text{C}$  NMR of **2s** (100 MHz,  $\text{CDCl}_3$ ):

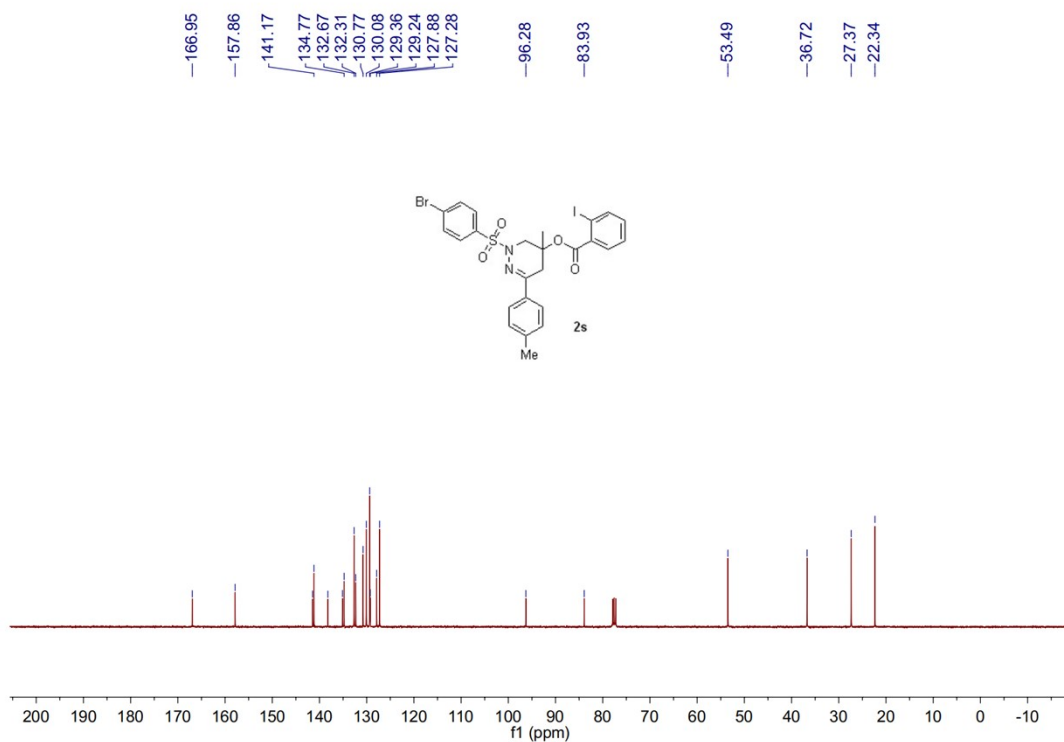

$^1\text{H}$  NMR of **2t** (400 MHz,  $\text{CDCl}_3$ ):

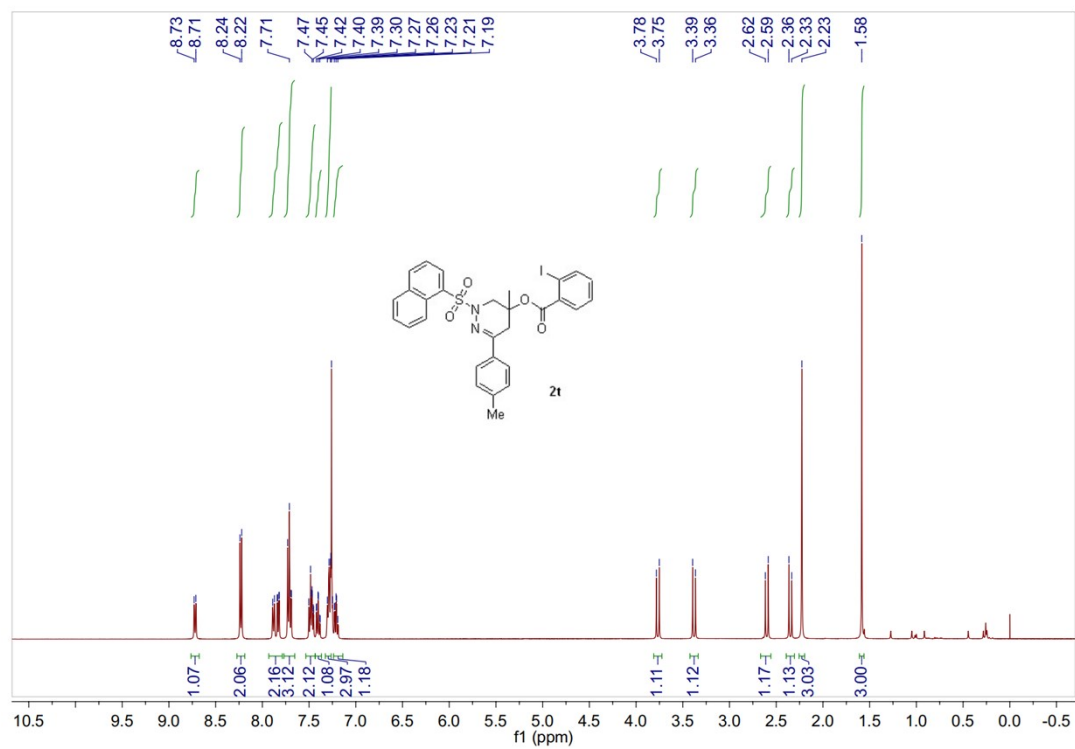

$^{13}\text{C}$  NMR of **2t** (100 MHz,  $\text{CDCl}_3$ ):

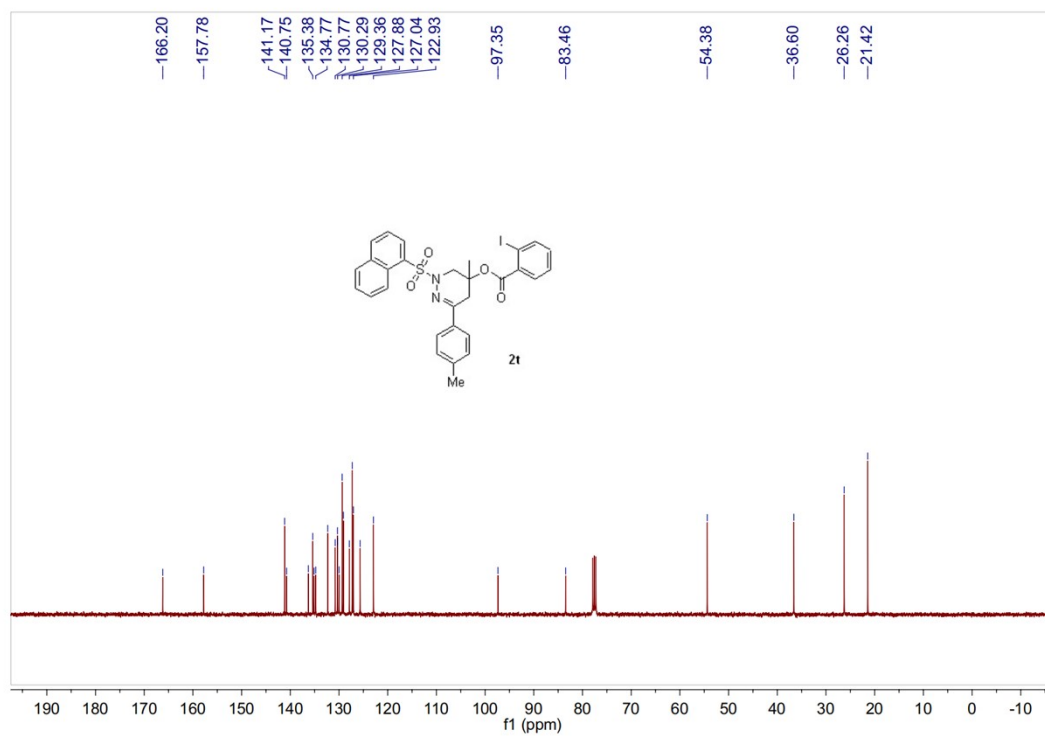

$^1\text{H}$  NMR of **2u** (400 MHz,  $\text{CDCl}_3$ ):

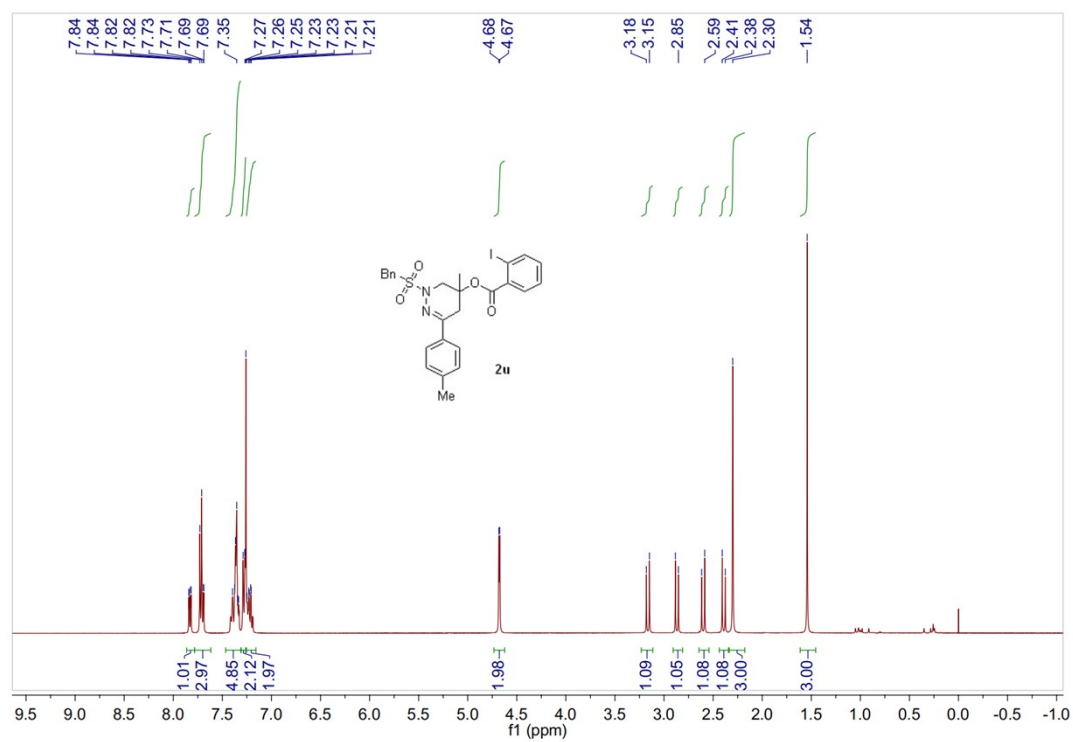

$^{13}\text{C}$  NMR of **2u** (100 MHz,  $\text{CDCl}_3$ ):

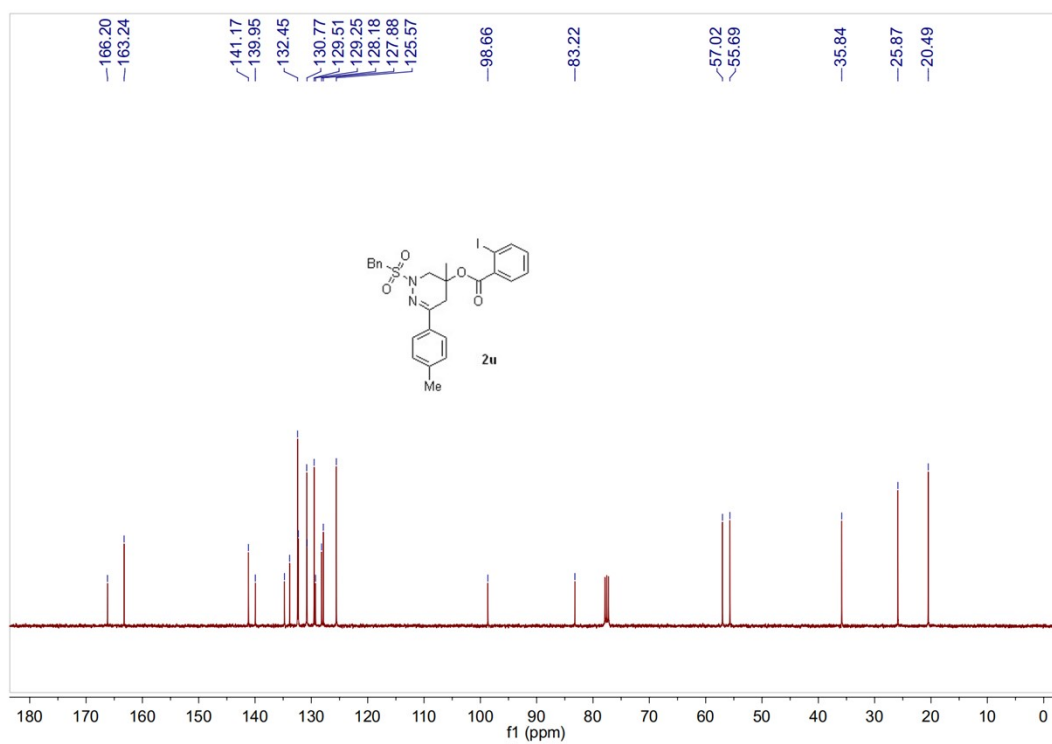



$^1\text{H}$  NMR of **2v** (400 MHz,  $\text{CDCl}_3$ ):

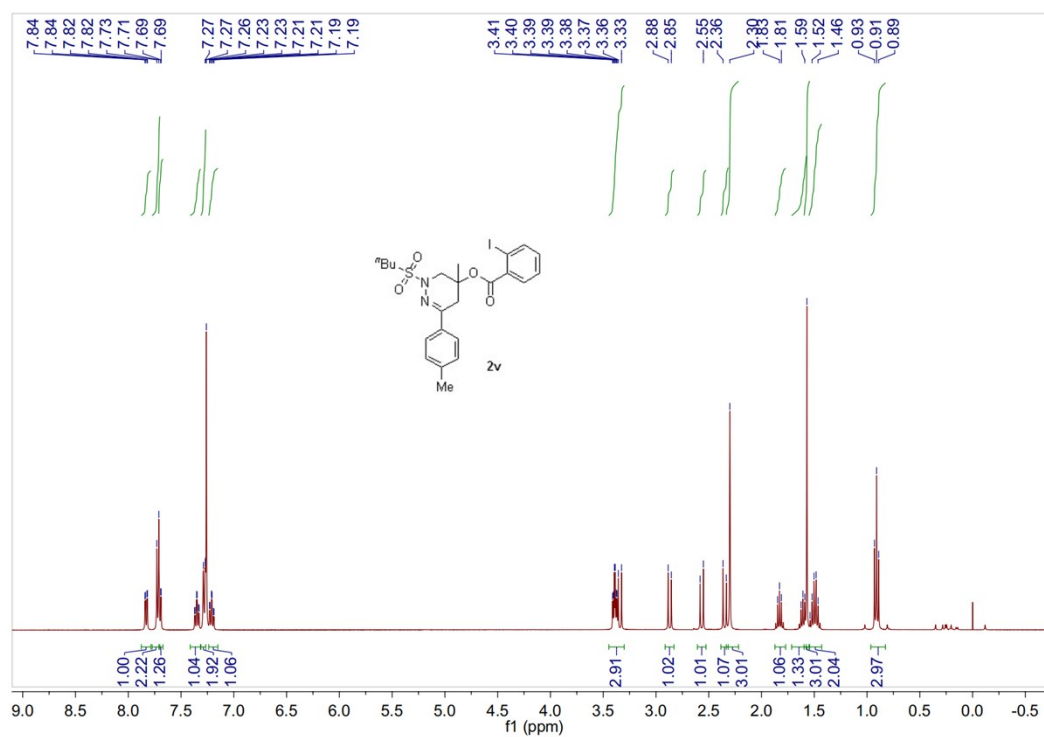

$^{13}\text{C}$  NMR of **2v** (100 MHz,  $\text{CDCl}_3$ ):

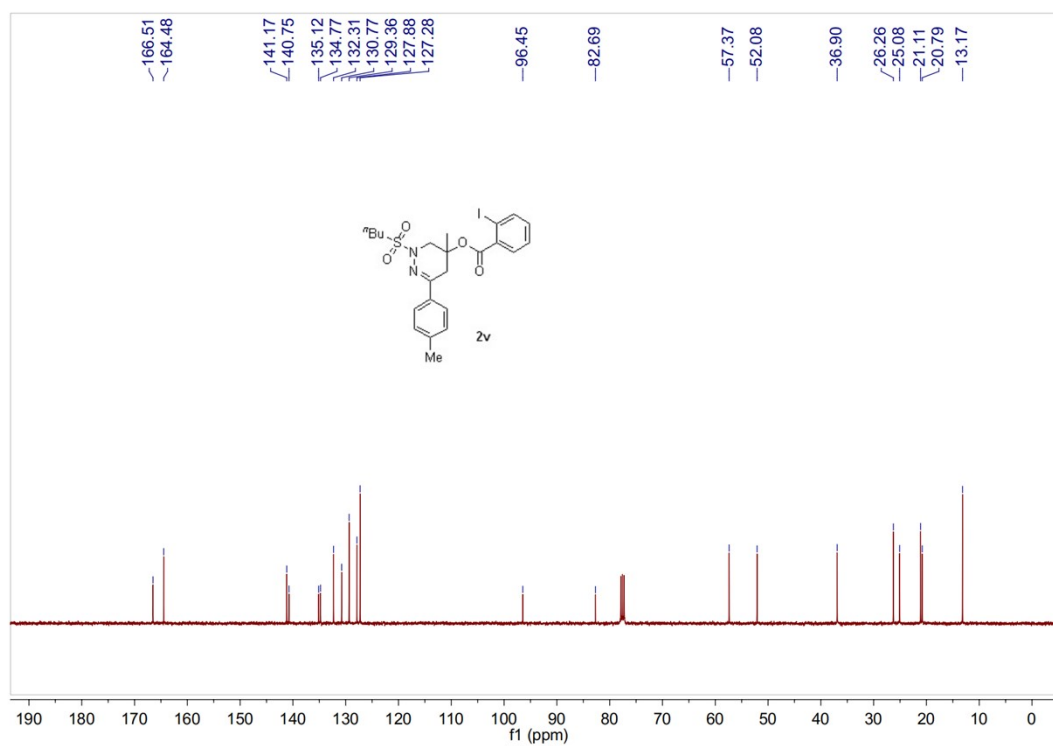

$^1\text{H}$  NMR of **2w** (400 MHz,  $\text{CDCl}_3$ ):

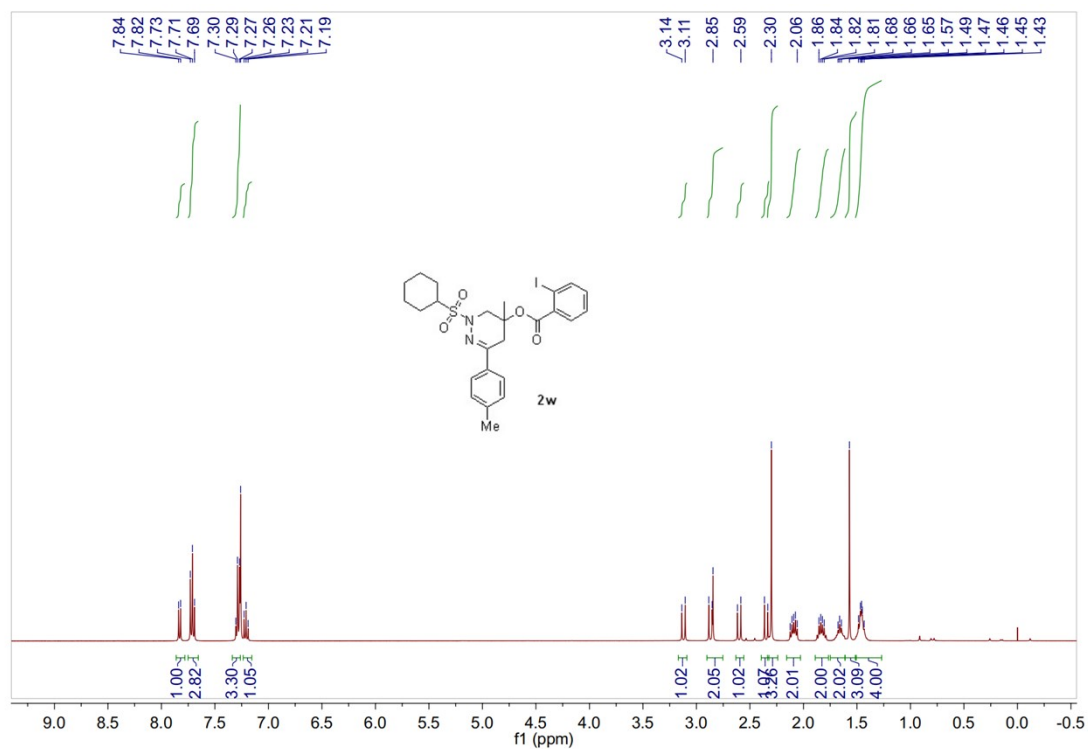

$^{13}\text{C}$  NMR of **2w** (100 MHz,  $\text{CDCl}_3$ ):

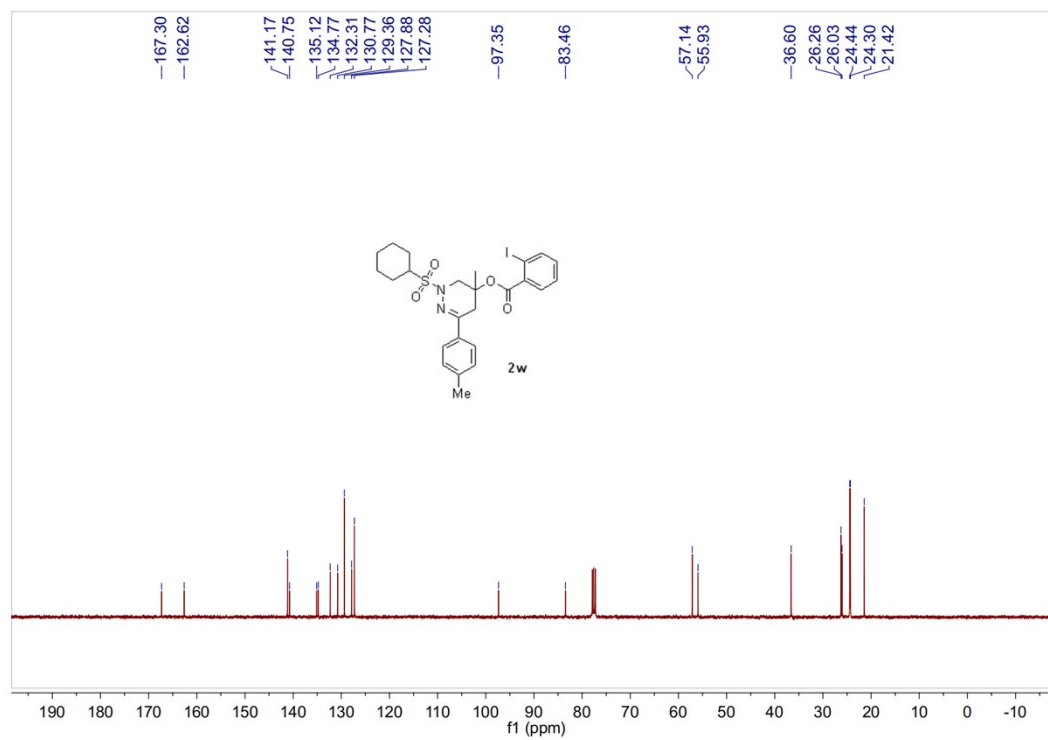

$^1\text{H}$  NMR of **2x** (400 MHz,  $\text{CDCl}_3$ ):

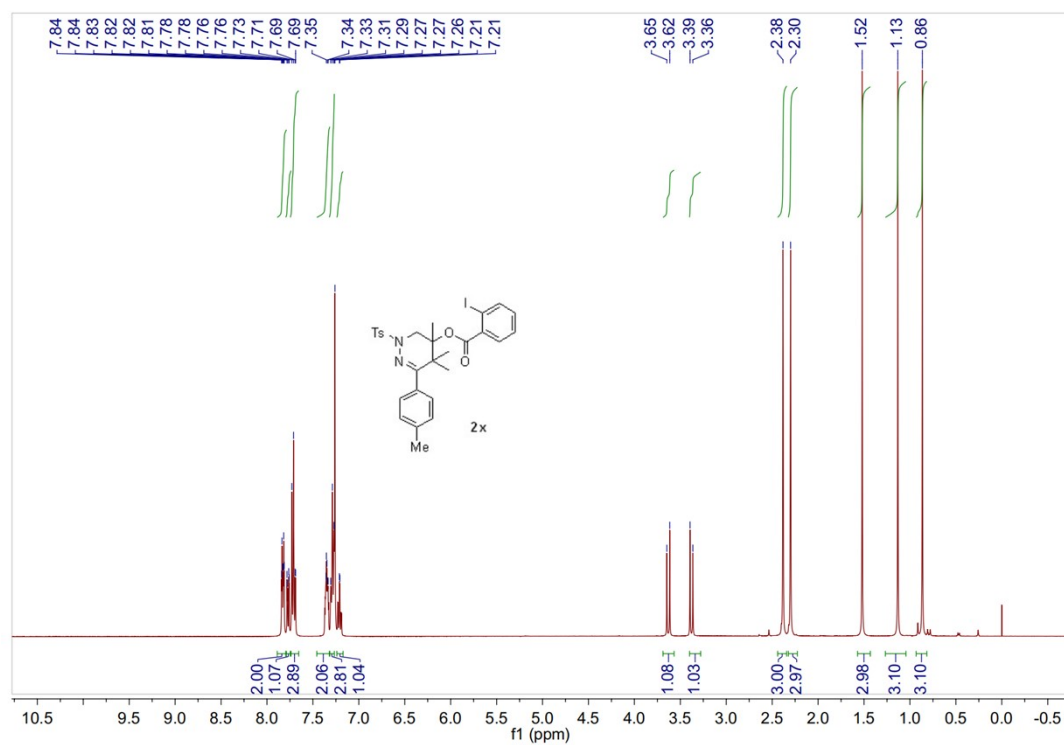

$^{13}\text{C}$  NMR of **2x** (100 MHz,  $\text{CDCl}_3$ ):

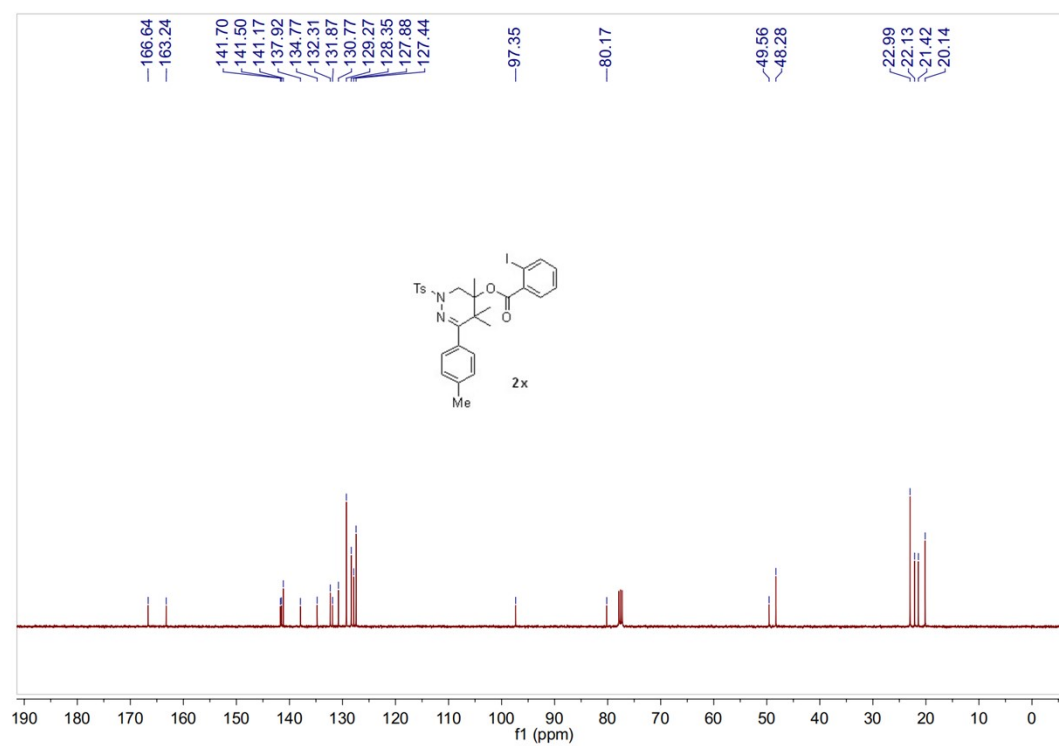

$^1\text{H}$  NMR of **2y** (400 MHz,  $\text{CDCl}_3$ ):

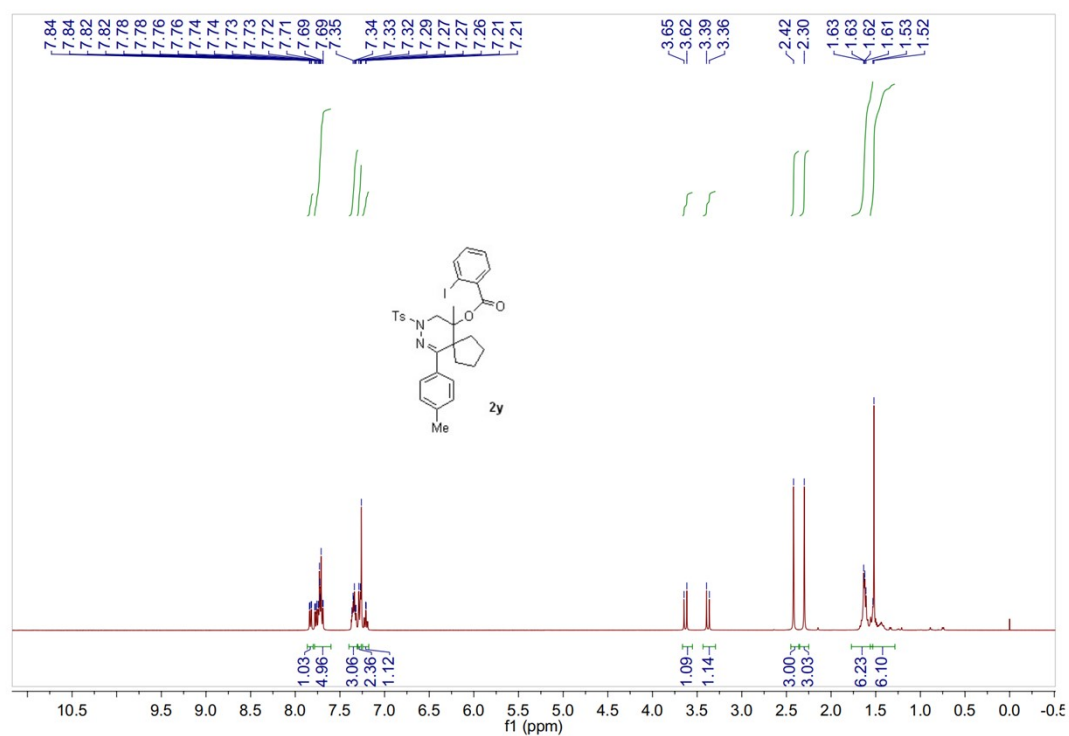

$^{13}\text{C}$  NMR of **2y** (100 MHz,  $\text{CDCl}_3$ ):

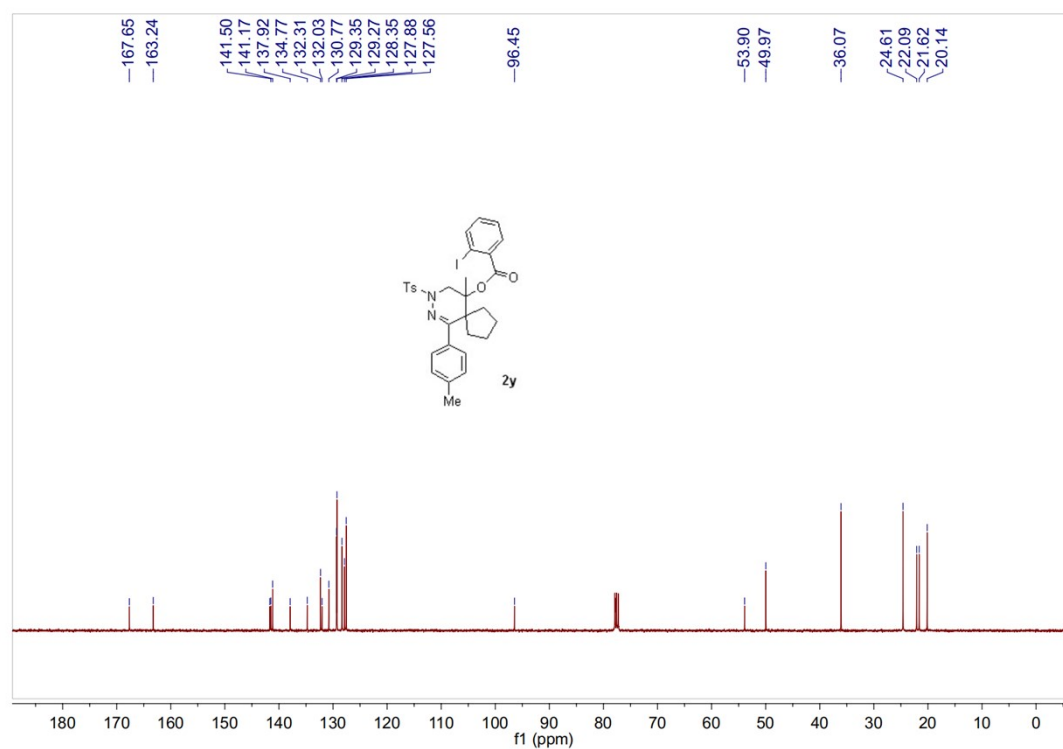

$^1\text{H}$  NMR of **2z** (400 MHz,  $\text{CDCl}_3$ ):

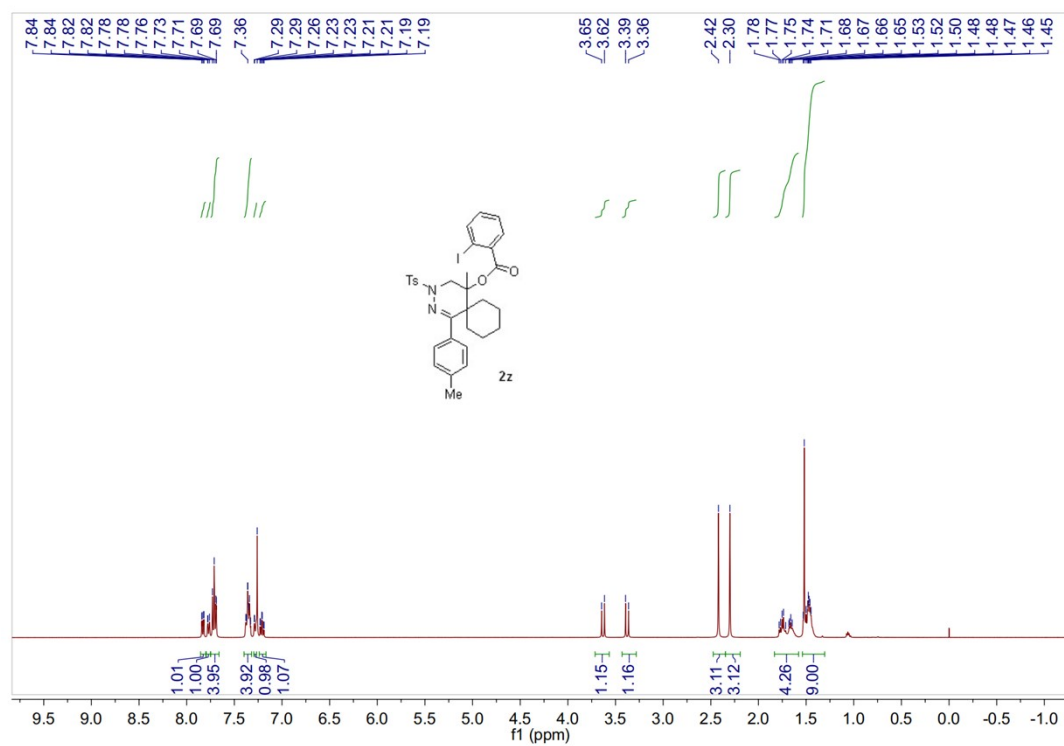

$^{13}\text{C}$  NMR of **2z** (100 MHz,  $\text{CDCl}_3$ ):

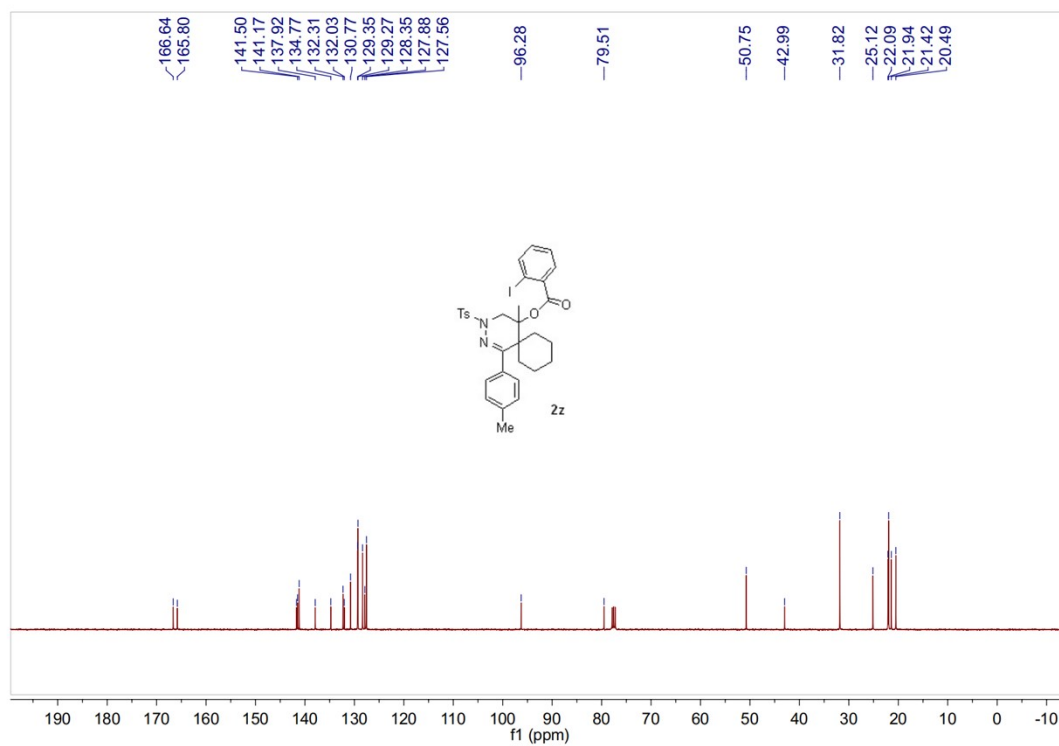

$^1\text{H}$  NMR of **3** (400 MHz,  $\text{CDCl}_3$ ):

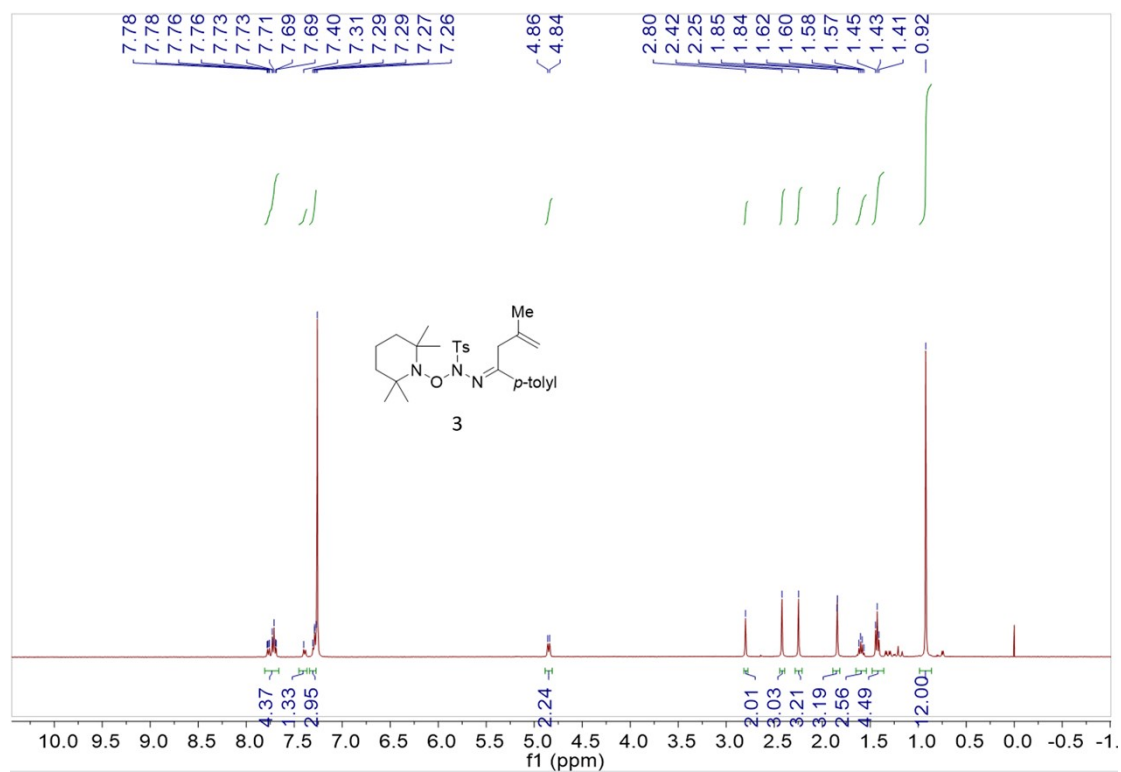

$^{13}\text{C}$  NMR of **3** (100 MHz,  $\text{CDCl}_3$ ):

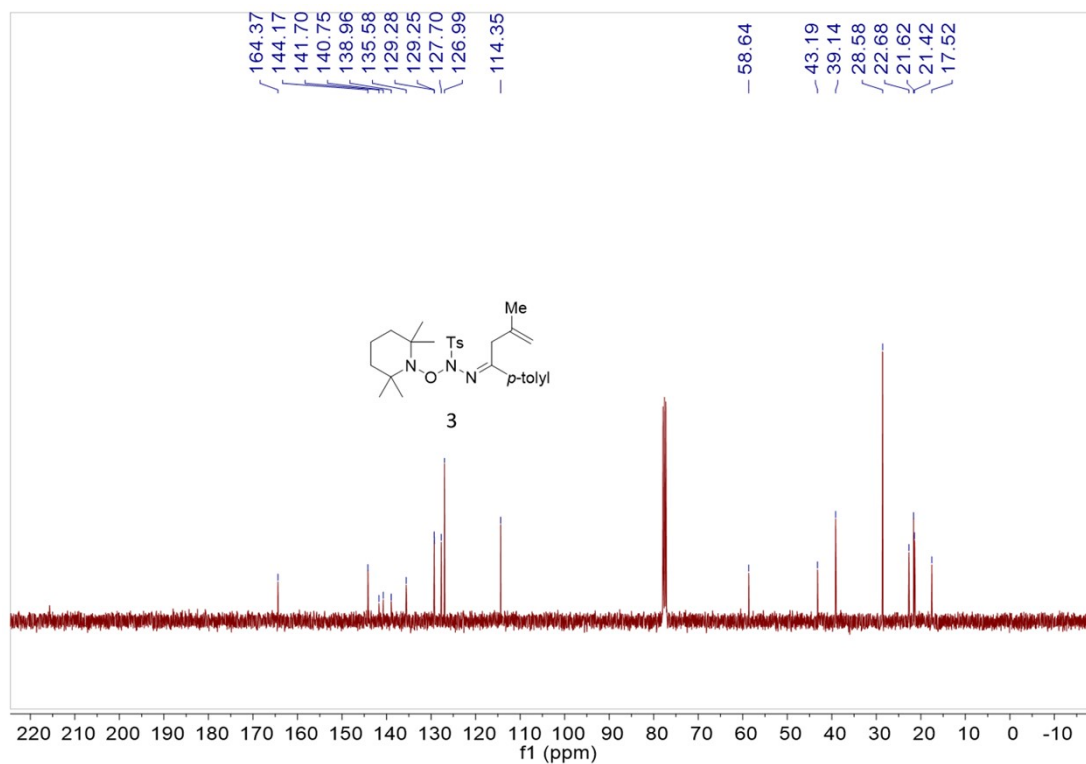

$^1\text{H}$  NMR of **6** (400 MHz,  $\text{CDCl}_3$ ):

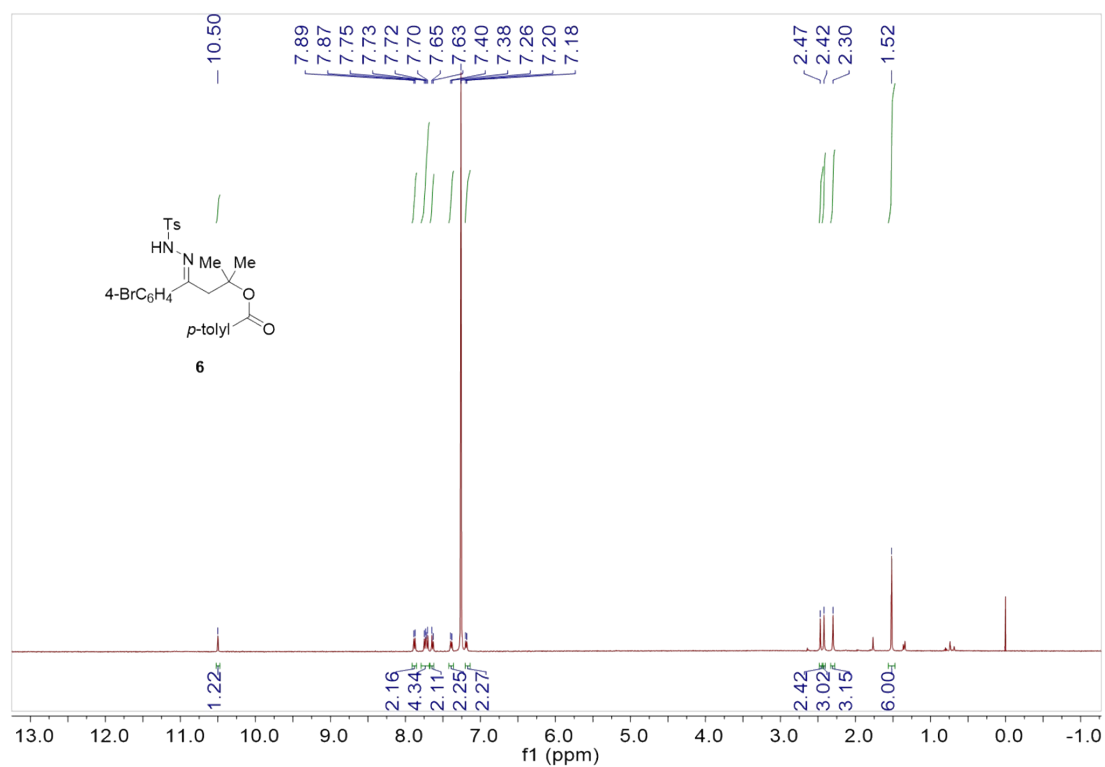

$^{13}\text{C}$  NMR of **6** (100 MHz,  $\text{CDCl}_3$ ):

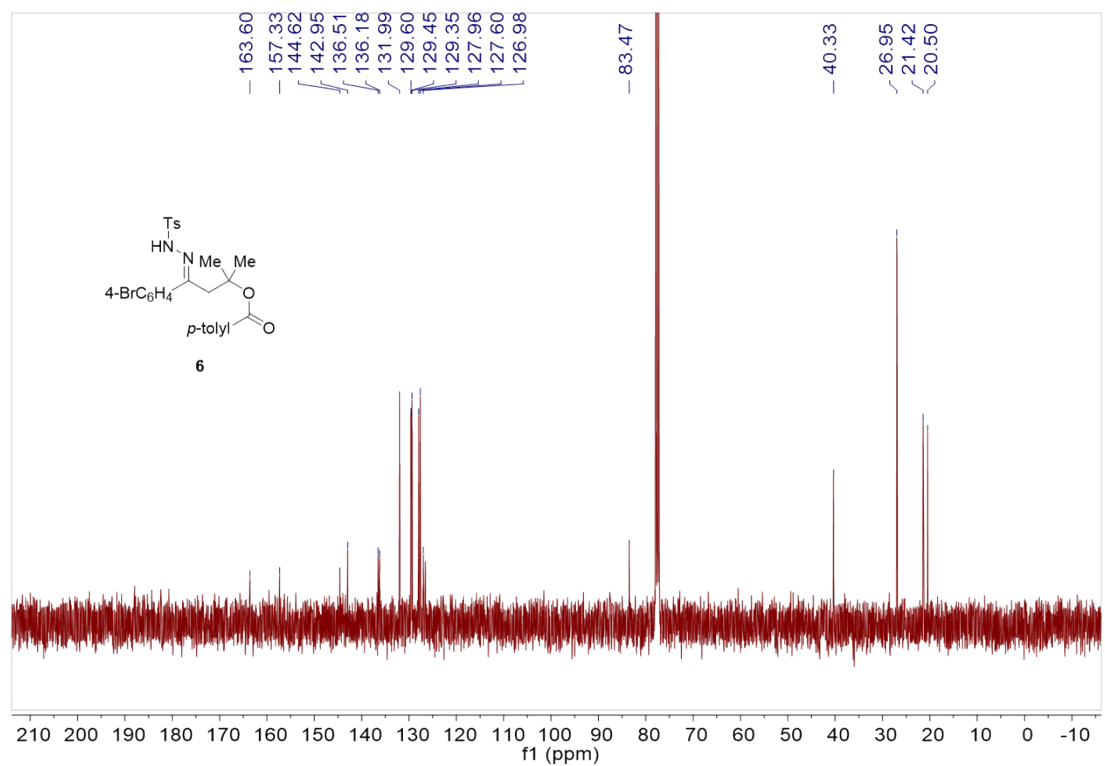

Supplement: d3ob01125a1.pdf [file d3ob01125a1.pdf]
